1 *Major Category: Biological Sciences*

*Minor Category: Neuroscience*

2  
3 **Molecular Profiling to Infer Neuronal Cell Identity: Lessons from small**  
4 **ganglia of the Crab *Cancer borealis***

5  
6 Adam J. Northcutt<sup>1,2\*</sup>, Daniel R. Kick<sup>1\*</sup>, Adriane G. Otopalik<sup>3</sup>, Benjamin M. Goetz<sup>4</sup>, Rayna M.  
7 Harris<sup>2,4,5</sup>, Joseph M. Santin<sup>1</sup>, Hans A. Hofmann<sup>2,4,5,6</sup>, Eve Marder<sup>3#</sup>, and David J. Schulz<sup>1,2#</sup>

8  
9 <sup>1</sup>Division of Biological Sciences, University of Missouri-Columbia, Columbia, MO USA 65211

10  
11 <sup>2</sup>Neural Systems and Behavior Course, Marine Biological Laboratory, Woods Hole,  
12 MA, USA 02543

13  
14 <sup>3</sup>Volen Center and Biology Department, Brandeis University, Waltham, MA USA 02454

15  
16 <sup>4</sup>Center for Computational Biology and Bioinformatics, The University of Texas at Austin, Austin,  
17 TX, USA 78712

18  
19 <sup>5</sup>Department of Integrative Biology and Institute for Cellular and Molecular Biology, The  
20 University of Texas at Austin, Austin, TX, USA 78712

21  
22 <sup>6</sup>Institute for Neuroscience, The University of Texas at Austin, Austin, TX, USA 78712

23  
24 \* indicates equal contributions by both authors

25  
26 **ABBREVIATED TITLE:** Molecular Profiling of Neuronal Cell Identity

27  
28 **Email addresses:**

29 Northcutt, Adam J. <ajn352@mail.missouri.edu>; Kick, Daniel R. <dkr8b9@mail.missouri.edu>; Otopalik,  
30 Adriane G. <adriane.g.otopalik@gmail.com>; Goetz, Benjamin G. <benni@utexas.edu>; Harris, Rayna M.  
31 <rmharris@ucdavis.edu>; Santin, Joseph M. <santinj@missouri.edu>; Hofmann, Hans A.  
32 <hans@utexas.edu>; Marder, Eve <marder@brandeis.edu>; Schulz, David J. <schulzd@missouri.edu>

33  
34  
35  
36 **# Correspondence to:**

37 Dr. David J. Schulz  
38 University of Missouri  
39 Department of Biological Sciences  
40 Columbia, MO, 65211, USA  
41 schulzd@missouri.edu

42  
43  
44 **# Correspondence to:**

45 Dr. Eve Marder  
46 Brandeis University  
47 Department of Biological Sciences  
48 Waltham, MA, 02454, USA  
49 marder@brandeis.edu

50  
51  
52  
53 **KEYWORDS:** qPCR, RNA-seq, ion channel genes, receptor genes

54 **ABSTRACT**

55 Understanding circuit organization depends on identification of cell types. Recent advances in  
56 transcriptional profiling methods have enabled classification of cell types by their gene  
57 expression. While exceptionally powerful and high throughput, the ground-truth validation of  
58 these methods is difficult: if cell type is unknown, how does one assess whether a given  
59 analysis accurately captures neuronal identity? To shed light on the capabilities and limitations  
60 of solely using transcriptional profiling for cell type classification, we performed two forms of  
61 transcriptional profiling – RNA-seq and quantitative RT-PCR, in single, unambiguously identified  
62 neurons from two small crustacean networks: the stomatogastric and cardiac ganglia. We then  
63 combined our knowledge of cell type with unbiased clustering analyses and supervised machine  
64 learning to determine how accurately functionally-defined neuron types can be classified by  
65 expression profile alone. Our results demonstrate that expression profile is able to capture  
66 neuronal identity most accurately when combined with multimodal information that allows for  
67 post-hoc grouping so analysis can proceed from a supervised perspective. Solely unsupervised  
68 clustering can lead to misidentification and an inability to distinguish between two or more cell  
69 types. Therefore, our study supports the general utility of cell identification by transcriptional  
70 profiling, but adds a caution: it is difficult or impossible to know under what conditions  
71 transcriptional profiling alone is capable of assigning cell identity. Only by combining multiple  
72 modalities of information such as physiology, morphology or innervation target can neuronal  
73 identity be unambiguously determined.

74

75 **SIGNIFICANCE STATEMENT**

76 Single cell transcriptional profiling has become a widespread tool in cell identification,  
77 particularly in the nervous system, based on the notion that genomic information determines cell  
78 identity. However, many cell type classification studies are unconstrained by other cellular  
79 attributes (e.g., morphology, physiology). Here, we systematically test how accurately  
80 transcriptional profiling can assign cell identity to well-studied anatomically- and functionally-  
81 identified neurons in two small neuronal networks. While these neurons clearly possess distinct  
82 patterns of gene expression across cell types, their expression profiles are not sufficient to  
83 unambiguously confirm their identity. We suggest that true cell identity can only be determined  
84 by combining gene expression data with other cellular attributes such as innervation pattern,  
85 morphology, or physiology.

86

87

88

## 89 INTRODUCTION

90 Unambiguous classification of neuronal cell types is a long-standing goal in  
91 neuroscience with the aim to understand the functional components of the nervous system that  
92 give rise to circuits and, ultimately, behavior (1–6). Beyond that, agreement upon neuronal cell  
93 types provides the opportunity to greatly increase reproducibility across investigations, allows  
94 for evolutionary comparisons across species (7, 8), and facilitates functional access to and  
95 tracking of neuron types through developmental stages (9). To this end, attempts at defining  
96 neuronal identity have been carried out using morphology, electrophysiology, gene expression,  
97 spatial patterning, and neurotransmitter phenotypes (10–18). Since the earliest efforts to  
98 capture the transcriptomes of single neurons, using linear or PCR amplification of mRNA  
99 followed by either cDNA library construction (19) or microarray hybridization (10, 20, 21),  
100 scRNA-seq (22) has become the method of choice for many genome-scale investigations into  
101 neuron cell type. Advances in microfluidics, library preparation, and sequencing technologies  
102 have propelled an explosion of molecular profiling studies seeking to use unique gene  
103 expression patterns to discriminate neuronal types from one another, whether for discovery of  
104 new types or further classification of existing ones (23, 24, 33–36, 25–32).

105 Molecular profiling approaches to tackle the problem of neuronal cell identity have many  
106 advantages: first, single-cell transcriptomic data contain thousands of measurements in the form  
107 of gene products that can be used both in a qualitative (in the form of marker genes) and  
108 quantitative (in the form of absolute transcript counts) manner (6). Second, scRNA-seq allows  
109 for very high-throughput processing of samples with hundreds, if not thousands, of single cell  
110 transcripts simultaneously using barcoding techniques (37). Third, these techniques can be  
111 applied to species that lack well-annotated transcriptomic information, as the cost to generate  
112 *de novo* reference transcriptomes has decreased dramatically in recent years (38). Even the  
113 sequencing of heterogeneous tissues from the central nervous system (CNS) can be used in  
114 conjunction with predictive modeling to reconstruct markers for major classes of CNS cell types,

115 as has been done with oligodendrocytes, astrocytes, microglia, and neurons, in both humans  
116 and mice (39). Classifying neurons into different major categories (such as excitatory vs  
117 inhibitory, parvalbumin<sup>+</sup> vs parvalbumin<sup>-</sup>, etc.) using qualitative expression measures is an  
118 easier task than quantitative approaches that separate neurons into smaller subclasses, but  
119 runs into limitations as to how far further classification can proceed. Subclasses of neuron types  
120 likely require greater depth of sequencing to resolve, and these neurons are more likely to be  
121 defined by the expression of multiple genes rather than unique markers (40). Yet this also is an  
122 inherent limitation of scRNA-seq: low abundance transcripts are often missed or inaccurately  
123 classified as differentially expressed (41), and methods to dissociate and isolate cells can alter  
124 their transcriptomic profiles before they are even measured (42, 43).

125         There now have been many studies seeking to determine how many transcriptomically-  
126 defined cell types might be present in a given part of the brain. For instance, an initial study of  
127 the cell type diversity of the mouse primary visual cortex revealed 42 neuronal and 7 non-  
128 neuronal cell types (25). More recent work from the same group identified 133 transcriptomic  
129 cell types (44). Work in the retina has led the way as an example of generating a cell type  
130 consensus with an unknown endpoint. Multimodal information of retinal ganglion cell properties,  
131 including morphology, physiology, gene expression, and spatial patterning, has converged on  
132 over 65 cell types in the macaque fovea and peripheral retina (45). However, not all systems  
133 have the same technical advantages as the retinal ganglion cells (such as uniform spatial  
134 patterning) that can be indicative of cell type, and multimodal information can be more difficult to  
135 obtain than high-throughput transcriptomic profiling methods. Therefore, the reliability of  
136 transcriptomic profiling with respect to neuronal identity requires additional evaluation.

137         In this study, we validate and compare transcriptional profiling via scRNA-seq and qRT-  
138 PCR methods, using supervised and unsupervised analyses, in model systems in which  
139 neurons are unambiguously identified based on electrophysiological output, synaptic  
140 connectivity, axonal projection, and innervation target: the stomatogastric (STG) and cardiac

141 ganglia (CG) of the crab, *Cancer borealis*. This approach allows us to directly test how much of  
142 the known functional identity of a neuron is captured in the transcriptomic profile of single  
143 neurons within a given network.

144

## 145 **RESULTS**

### 146 **Molecular Profiling of Single Identified STG and CG Neurons by RNA-seq**

147 Because of their large individual cell body size and our ability to manually collect single  
148 identified STG neurons (Fig. 1), we generated transcriptomes for Pyloric Dilator (PD; N=11),  
149 Gastric Mill (GM; N=11), Lateral Pyloric (LP; N=8), and Ventricular Dilator (VD; N=8) neurons by  
150 typical library preparations rather than more automated procedures such as Drop-seq, Split-  
151 Seq, or 10X Genomics (46). Sequencing data were mapped to the *C. borealis* nervous system  
152 transcriptome (47). After removing transcripts for which there was no expression in any cell  
153 type, our data set contained 28,459 distinct contigs (i.e. contiguous sequences) in the complete  
154 RNA-seq data set. These contigs represent more than the full set of genes transcribed in these  
155 cells, as multiple contigs may map to a single gene but during transcriptome assembly the  
156 intervening sequence could not be resolved to assemble these distinct fragments (see [58]). We  
157 then began our analysis of these data using unbiased hierarchical clustering methods, as is  
158 commonly done in this field. Using the complete data set (referred to as “All Expressed  
159 Contigs”), hierarchical clustering (with data centered and scaled across contigs) resulted in five  
160 clusters (Fig. 2A) that appeared not to segregate by cell type. One exception was observed  
161 among PD cells. All but two PD cells fell within one distinct cluster, albeit with a GM cell also  
162 identified in this cluster (Fig. 2A). While not surprising, the complete cellular transcriptome on its  
163 own does not distinguish cell types.

164 We identified and extended our unbiased analysis to the most variably expressed genes  
165 in the RNA-seq dataset. The first subset represents the top 2000 most variable contigs

166 (referred to as the “H2K contigs”) and the second subset includes variable genes identified  
167 using a method described by Brennecke et al. (48), assuming a false discovery rate of 0.2,  
168 which resulted in 922 contigs (referred to as “HVG contigs”). Focusing on variably expressed  
169 contigs improved clustering with respect to cell identity, with the HVG dataset outperforming the  
170 H2K. In the HVG clustering (Fig. 2B), 8/11 GM cells, 5/8 VD cells, 5/8 PD cells, and 5/8 LP cells  
171 formed distinct clusters. However, these nodes are not perfectly segregated by cell type and  
172 cells of each kind fail to appropriately cluster. If blind to these cell types, the HVG clustering  
173 analysis yields 5-6 distinct cell-type clusters, rather than the appropriate 4 (Fig. 2B).

174 To achieve the best performance possible with scRNA-Seq clustering analyses, we  
175 unblinded the analyses to cell type and selected only differentially expressed transcripts. We  
176 selected two pools of differentially expressed transcripts: those with a 2-fold or higher level of  
177 expression difference and a q-value < 0.2 (referred to a “DE0.2”) or q-value <0.05 (“DE0.05”).  
178 Of course, differential expression (DE) analysis can only be carried with *a priori* knowledge of  
179 cell identity or some other post-hoc feature by which samples can be grouped. DE analysis with  
180 a q-value cutoff of 0.2 identified 137 transcripts (DE0.2), while a q-value of 0.05 identified only  
181 45 transcripts (DE0.05). Hierarchical clustering of the q<0.2 data set resulted in better  
182 clustering, but still failed to faithfully recapitulate cell identity. Hierarchical clustering was greatly  
183 improved by using the q<0.05 dataset (DE0.05; Fig. 2C) but remained imperfect.

184 To reveal which preprocessing and clustering methods best recapitulate the predicted  
185 number of clusters based on known cell identity, we applied eight cluster estimation algorithms  
186 (optCluster package (49)) on the DE0.05 data set (centered and scaled by contig, Ward.D2 and  
187 a correlation dissimilarity matrix; Fig. 2D). The highest performing clusterings using the DE0.05  
188 data resulted from using Ward’s D with a correlation distance metric, resulting in a Jaccard  
189 index of 0.738. The results of cluster estimation differed based on the preprocessing of the  
190 datasets. Cluster estimation algorithms were selected from a set of 10 algorithms for use with

191 continuous data as they all yielded usable output. We retained the top three predicted k values  
192 from each. When data were centered and scaled by contig (Fig. 2D), the mode number of  
193 clusters estimated was 3 (5 indices) and 5 (5 indices), and none predicted the correct number of  
194 4 clusters.

195 Finally, to assess whether unblinded analyses could predict cell type, we tested the  
196 ability of 8 supervised machine learning (sML) classification algorithms (generalized linear  
197 model (GLM), k-Nearest Neighbors (kNN), Neural Network (NN), Multinomial Neural Network  
198 (MNN), Random Forest (RF), Support Vector Machine with a linear kernel (SVML), Support  
199 Vector Machine with a radial kernel (SVMR), and Linear Discriminant Analysis (LDA)) to sort  
200 cells based on their transformed or untransformed mRNA abundances. Each model's accuracy  
201 on new data was estimated using 5-fold cross validation. To capture the variation in the All  
202 Expressed Contigs dataset, we transformed the data with PCA and used the first 38 principal  
203 components, which accounted for over 99% of the variation. The sML mean accuracies on the  
204 All Expressed Contigs (PCA transformed) data set were extremely low, with a maximum mean  
205 accuracy of 48.6% (Fig. 2E). sML accuracies improved substantially when classifying the RNA-  
206 seq data preprocessed to identify variably expressed contigs (H2K, HVG) and DE contigs  
207 (DE0.2, DE0.05), often producing 100% accuracy for several cross-validation folds (Fig. 2E). It  
208 should be noted that no method classified all folds with complete accuracy, even with only DE  
209 contigs— most methods ranged between 75% to 100% accuracy. While these results are  
210 encouraging, even under optimal conditions (transcriptomic data, selection of transcripts by  
211 differential expression, ability to use supervised methods) we were unable to consistently  
212 classify these neurons with 100% accuracy.

213

## 214 **Principal Component Analysis of scRNA-seq Datasets**



215 Principal Component Analysis (PCA) is often used to determine if the variance seen  
216 among transcript abundances can be used to separate cells into discrete types. Thus, we  
217 performed PCA on the four RNA-seq datasets (H2K, HVG, DE0.2, DE0.05) to examine the  
218 ability of this approach to discriminate among cell types (Fig. 3). For most of these datasets, the  
219 first principal component (PC1) accounted for >40% of the explained variance, with the  
220 exception of the HVG dataset (Fig. 3). As such, we have listed the top 10 contigs contributing to  
221 variation in PC1 for all four datasets in Table S1. We generated pairwise plots of all three PCs in  
222 attempts to visualize separation of samples into distinct cell types. There is little ability to resolve  
223 cell type differences in the H2K and HVG datasets (Fig. 3A, 3B). However, the differentially  
224 expressed transcripts allow for some separation of cell type (Fig. 3C, 3D), with PD becoming  
225 somewhat distinct for example in the DE0.05 dataset (Fig. 3D).

226

## 227 **Gene Ontology Analyses of RNA-seq Datasets**

228 To determine the types of genes represented in our most variable (H2K and HVG) and  
229 differentially expressed (DE0.2, DE0.05) data sets among cell populations, we performed Gene  
230 Ontology (GO) Enrichment Analysis using analysis tools from the PANTHER Classification  
231 System (50). Because there is relatively little gene annotation work in the crab, we performed  
232 GO analysis by first using BLAST to find the top *Drosophila* ortholog for a given contig, and then  
233 retrieving the GO terms associated with this ortholog for analysis. Thus while this analysis  
234 provides interesting insight into cell-type specific differences in gene expression, there are  
235 limitations to the interpretation, particularly with regards to fold enrichment in *Drosophila* relative  
236 to crab. The most robust expression differences (highest Fold Enrichment) in the H2K Molecular  
237 Function dataset were those of ATP-synthase activity and clathrin binding (Table S2). Others of  
238 note include mRNA-3'UTR binding, cell adhesion molecule, and calcium ion binding (Table S2).  
239 More resolution is gained by examining the Biological Process category, where H2K contigs

240 were most overrepresented for “regulation of short-term neuronal synaptic plasticity,” “positive  
241 regulation of neuron remodeling,” “substrate adhesion-dependent cell spreading,” and “clathrin-  
242 dependent synaptic vesicle endocytosis” categories (Table S3) among many others. The HVG  
243 dataset shows relatively few enriched categories (Tables S4 and S5) with FDR correction  
244 employed, including ATP binding and transferase activity (related to acetylcholine synthesis).

245         The differentially expressed contigs of the DE0.2 data set showed no significantly  
246 enriched contigs with FDR employed. Without any p-value correction, a number of molecular  
247 function categories appear as enriched (Table S6). However, this is less an appropriate  
248 enrichment analysis (due to the relatively small number of contigs) and more a description of  
249 gene categories present in the DE0.2 contigs. The top several hits are all indicative of  
250 transmitter phenotype, particularly acetylcholine synthesis (Table S6). However, other receptor  
251 activity is represented, such as GABA-gated chloride channel and GABA-A receptor activity.  
252 Finally, cell-cell adhesion mediator activity appears once again in this list.

253

#### 254 **Molecular Profiling of Single Identified STG and CG Neurons Using Candidate Genes**

255         One class of genes that we were surprised to not see represented in DE analyses were  
256 the voltage-gated ion channels. A very recent study found that three classes of neuronal effector  
257 genes - ion channels, receptors and cell adhesion molecules - have the greatest ability to  
258 distinguish among morphologically distinct mouse cortical cell populations (51). Our previous  
259 work also suggests that differential expression of ion channel mRNAs in STG cells may give rise  
260 to their distinct firing properties (52–54). We therefore examined our scRNA-seq data for  
261 expression of ion channel mRNAs. Overall, while the sequencing captured most of the known  
262 voltage-gated channel subtypes known in *C. borealis*, raw counts were very low (Fig. 4).

263 Therefore, we decided to use a qRT-PCR approach to directly test the hypothesis that channels  
264 and transmitter receptors are effective genes of interest to differentiate known neuron subtypes.

265 To examine the molecular profile of individual identified neurons with qRT-PCR, we  
266 targeted the following transcripts: ion channels, receptors, gap junction innexins, and  
267 neurotransmitter-related transcripts. These cellular components are responsible for giving  
268 neurons much of their unique electrophysiological outputs. As such, we predicted that  
269 correspondingly unique expression patterns for this gene set would be present in each neuron  
270 type. Using multiplex qRT-PCR, we measured the absolute copy number of 65 genes of interest  
271 (see Table S7) from 124 individual STG neurons of 11 different types (10 STG neuron types:  
272 PD, LPG (Lateral Posterior Gastric), VD, GM, LP, PY (Pyloric), IC (Inferior Cardiac), LG Lateral  
273 Gastric), MG (Median Gastric), DG (Dorsal Gastric) and the Large Cell (LC) motor neurons  
274 from the cardiac ganglion (N = 10-15 per type). We then used various methods of unsupervised  
275 clustering to generate the “best” clustering of these cells based on *a priori* known cell type. This  
276 included substituting any missing values in the qRT-PCR data set via median interpolation.

277 We then used k-means, unsupervised hierarchical, and SNN-Cliq clustering to generate  
278 unbiased clustering analyses based on expression of these genes of interest. Initial  
279 interrogation focused on data transformations with a fixed hierarchical clustering scheme  
280 (Ward's D2, Correlation dissimilarity matrix as for the scRNA-seq analysis). Unscaled data as  
281 well as centered and data scaled data by gene resulted in different hierarchical clustering  
282 patterns. Using unscaled data, hierarchical clustering performed rather poorly in terms of  
283 generating distinct clusters that match known cell identity. Performance – as assessed by  
284 Jaccard Index – was improved by scaling data across genes, generating 8 distinct nodes with  
285 high bootstrap support in hierarchical clustering that capture some of the features of known cell  
286 identity (LC, IC, LG, LPG, VD, GM, LP, PD; Fig. 5A). However, multiple cell types fall into

287 clusters that either do not show any separation by neuron identity (DG, MG, PY) or show no  
288 bootstrap support based on hierarchical clustering (AU p-value = 0).

289 We sought to determine the upper bound for clustering performance with our dataset. If  
290 the known anatomical and physiological cell identity is reflected in the ion channel and receptor  
291 mRNA profile of STG neurons, then we hypothesize that clustering analyses performed on  
292 these mRNA data will yield 11 distinct clusters for our dataset. To determine the feasibility of  
293 clustering to sort cell types we tested 107 clusterings (varying clustering methods, distance  
294 metrics, and neighbors considered) for each data set. Each clustering was compared against  
295 the known cell identities with the Jaccard Index which ranges from 0 to 1 where 1 is perfect  
296 correspondence between clusterings – in this case the clustering and cell identity. The best  
297 performing combination was data scaled by target and processed using Ward's D2 Hierarchical  
298 clustering with a correlation distance matrix (Jaccard = 0.636). By contrast the next best  
299 clusterings, Ward's D on raw counts using Canberra distance and Ward's D on data scaled by  
300 cell using Manhattan distance only achieved Jaccard indices of 0.495 and 0.487 respectively.  
301 The three least performant methods were Median hierarchical clustering with Canberra distance  
302 (0.084), hierarchical centroid clustering with Manhattan distance (0.859), and SNN-Cliq  
303 clustering with Binary distance and 9 neighbors (0.859). Examining the best performing  
304 clustering reveals that LP, PD, LG, IC, DG, LC, PY, GM, LPG, and VD separate fairly well.

305 Given that an *a priori* known number of cell types represented in a sample is rare, we  
306 tested whether we would have arrived at the correct number of cell types in our sample had we  
307 been blind to their identity. We used the best performing transformations from the clustering  
308 analysis, i.e. data centered and scaled by gene and a correlation dissimilarity matrix, and 8  
309 cluster determination indices provided by the optCluster package (49). We allowed a minimum  
310 of 2 and a maximum of 32 clusters for this and later cluster determination analyses. The mode  
311 of the top 3 predicted k values for 8 different methods of cluster estimation was 2 (6 indices),

312 followed by 4 (the expected number of clusters) and 6 (3 indices each) (see Fig. 5B). If a  
313 researcher were using any one of these, or a majority vote of several, the chance they would  
314 conclude the correct number of 11 clusters are present would be vanishingly low.

315 We repeated our sML analyses on the qRT-PCR data to examine the “best case  
316 scenario” performance for clustering analyses. Performance varied substantially between  
317 algorithms (e.g. NN achieved a mean accuracy of 43.5% whereas SVMML produced a mean  
318 accuracy of 87.5%) and was affected by whether the data was centered and scaled (e.g. NN  
319 improved by 43.5%, SVMML did not improve) (Fig. 5C). The highest mean accuracy we achieved  
320 was 87.5% (SVMML, either with or without scaling). We considered a principal component  
321 transformation as well, but improved the maximum mean accuracy little (NN, 87.9%) and  
322 worsened the previously most performant methods (SVMML decreased from 87.5% to 66.5%,  
323 unscaled and 67.4%, scaled). Although neither produces the highest mean accuracy, RF  
324 (87.2%-83.2%), GLM (86.6%-79.2%), and LDA (81.9%-77.7%) performed consistently across  
325 transformations, but clearly not equally well. Overall, the top performing accuracy methods  
326 involved centering and scaling the data across genes, and yielded similar efficacies across  
327 algorithms (Fig. 5C).

328 Finally, we repeated the Principal Component Analysis (PCA) to determine if the  
329 variance seen among transcript abundances can be used to separate these 11 cell types into  
330 discrete clusters. The first two principal components (PC1 and PC2) generated from the qRT-  
331 PCR data accounted for 31.2% and 16.6% of the variance, respectively (Fig. 5D). PC3  
332 accounted for 9.6% of the variance across samples. The top 10 mRNAs contributing to each of  
333 these PCs is are listed in Table S1. We generated pairwise plots of all three PCs in attempts to  
334 visualize separation of samples into distinct cell types. The most consistent result across all  
335 comparisons was that LC neurons from the cardiac ganglion formed a cluster that had less  
336 overlap with STG neurons than STG neurons did with each other, particularly in the dimension

337 of PC1 vs. PC2 (Fig. 5D). Visualization of PC1 vs. PC3 and PC2 vs. PC3 also give some  
338 indication that even with these target genes of interest we are able to resolve some separation  
339 of these groups (Fig. 5D). However, without such extensive *a priori* knowledge about cell type  
340 overall it is difficult to see how PCA would be effective in separating these 11 cell types based  
341 on the expression data at hand.

342

### 343 **Comparison of qRT-PCR and RNA-seq Results**

344 To ensure that the RNA-seq and qRT-PCR data were producing comparable expression  
345 results, we identified 4 different transcripts that were represented both in the DE data set from  
346 the RNA-seq and the qRT-PCR data set for the four cell types used in RNA-seq (PD, LP, GM,  
347 VD). Overall, there is very strong agreement in expression patterns for all four genes (Fig. 6A),  
348 adding confidence to the quality of both data sets with respect to capturing native expression  
349 patterns. However, we then extracted the RNA-seq expression data for all 65 of the transcripts  
350 used in the qRT-PCR data set. When we performed hierarchical clustering analysis and PCA  
351 using these 65 channel and receptor transcripts, the qRT-PCR clusters with nearly 100%  
352 success (with the exception of 2 GM neurons) into nodes that contain the 4 known distinct cell  
353 types, while the RNA-seq dataset using the same transcripts fails to generate coherent cell type  
354 clusters (Fig. 6B; 6C). As we examined this further, we realized that the four transcripts in  
355 Figure 6A (*ChAT*, *vAChT*, *NMDA2B*, *KCNK1*) represent somewhat higher abundance  
356 transcripts that were differentially expressed and showed consistent patterns between qPCR  
357 and RNA-seq methods. Other highly expressed transcript types were not differentially  
358 expressed (e.g. *NaV*, *INX1-3*), and therefore do not contribute strongly to distinguishing cell  
359 identity. Conversely, many of the other transcripts in the qRT-PCR data set that were distinct  
360 across cell types had very low levels of detected expression in the RNA-seq data set (Fig. 4).

361

362 **DISCUSSION**

363         Many projects currently attempting to describe neuronal cell types begin with the  
364 acquisition of molecular profiles from populations of unidentified neurons (25, 35, 55). Our  
365 results demonstrate the strengths and limitations of both unsupervised and supervised methods  
366 that rely solely on a molecular profile to recapitulate neuron identity. We accomplish this by  
367 working “backwards” from an unambiguously known cell identity in a system with a rich history  
368 of single-cell neurophysiological characterization, the crustacean stomatogastric ganglion. Our  
369 analysis clearly demonstrates that even with the most complete *a priori* knowledge of cell type in  
370 the analysis, there are limitations to determining cell identity through mRNA expression profiles  
371 alone. However, our analyses add to compelling supporting evidence that the molecular profile  
372 can partially indicate identity, particularly once supervised methods incorporating known cell  
373 identification are employed.

374         There is increasing evidence that classes of genes may differentiate cell types. For  
375 example, genes underlying synaptic transmission machinery were critical for separating mouse  
376 cortical GABAergic neurons into different types (56). Sets of genes that are regulated together  
377 that can be thought of as a “gene batteries” have also been shown to be indicative of cell type.  
378 One well-studied example of this can be found in *C. elegans*, wherein there is expression of  
379 neuron-type-specific combinations of transcription factors (57). Most recently, three classes of  
380 neuronal effector genes - ion channels, receptors and cell adhesion molecules – were  
381 determined to have the greatest ability to distinguish among genetically- and anatomically-  
382 defined mouse cortical cell populations (51). Consistent with this work, our GO analysis of the  
383 2000 most variable contigs in our scRNA-seq data set (H2K) revealed that the top 5 Biological  
384 Process terms that were significantly enriched included “regulation of short-term neuronal  
385 synaptic plasticity,” “substrate adhesion-dependent cell spreading,” and “clathrin-dependent

386 synaptic vesicle endocytosis.” Specifically, our differentially expressed contigs dataset (DE0.2)  
387 revealed Molecular Function enrichment for terms related to transmitter identity (“choline:sodium  
388 symporter activity” and “acetylcholine transmembrane transporter activity” among others),  
389 specifically identified two GABA receptor function terms (“GABA-gated chloride ion channel  
390 activity” and “GABA-A receptor activity”) and also included “cell-cell adhesion mediator activity.”  
391 Finally, our entire qRT-PCR experiment focused on the expression of ion channels, receptors,  
392 gap junction innexins, and neurotransmitter-related transcripts. While these 65 genes were not  
393 sufficient for classifying cells into known types, this modest number of transcripts discriminated  
394 neuron types fairly well. Thus, categorical families of neuronally expressed genes may yield the  
395 most useful data for subdividing neurons into distinct classes or subtypes.

396         Retinal ganglion cells of mice show spatial patterning in which cells of the same type are  
397 distributed with exclusionary zones around them where no other cells of that type are found,  
398 while cells of different types do not exhibit spatial patterning and are more randomly distributed  
399 (58). Molecular classification of neurons in *C. elegans* found that anatomically distinct neurons  
400 have correspondingly distinct molecular profiles >90% of the time (59). However, 146 distinct  
401 molecular profiles were identified from the 118 anatomically distinct neuron classes, indicating  
402 the potential for molecular sub-classification. This classification relied on hierarchical clustering  
403 that was carried out solely on identified reporter genes (most prominently transcription factors  
404 and GPCR-type sensory receptors) known to be differentially expressed across the 302 neurons  
405 of *C. elegans* from Wormbase.org (60) and not whole transcriptome molecular profiles. It is  
406 reassuring that the expression of a wide variety of reporter genes known to be differentially  
407 expressed across a population of neurons can recapitulate cell identity. But, this relies on  
408 having an established definition of neuron type – in this case anatomical – to constrain  
409 hierarchical clustering, as differential expression analysis can only be carried out by assigning  
410 samples to different populations. Our results are consistent with these findings, in that clustering  
411 is most reliable when differentially expressed targets are present. Yet our data also demonstrate



412 that without separating cell types *a priori* by such additional criteria, molecular cell classification  
413 can generate unreliable results, particularly with neurons that belong to the same network.

414         What are the sources of variability that could mask molecular identification of neuronal  
415 identity? Most common high-throughput molecular profiling techniques require destructive  
416 sampling to acquire mRNA abundances, which generates only a snapshot of the profile at a  
417 single point in time. Gene expression has stochastic characteristics (61, 62); transcription takes  
418 place not continually, but in bursts of expression (63) (reviewed in (64)); and steady-state  
419 mRNA abundances are the result of rates of expression, but also degradation and mRNA  
420 stability (65). Single cell transcriptomes can be altered biologically as a consequence of activity  
421 (66), injury (67), long-term memory formation (33), differentiation (68), and aging (23, 69), as  
422 well as being affected by technical noise (70). Cells also belong to different transcriptional states  
423 under certain conditions, with the major distinction between a cell type and cell state being that  
424 state is a reversible condition, where type is more constant and includes neuronal states (71).  
425 Neuron types exist in a continuum, exhibiting variation in expression patterns within defined cell  
426 types, increasing difficulty in discreetly drawing the cutoff of one type from another (72). Thus,  
427 the assertion that a given neuron has a single transcriptomic profile is an oversimplification and  
428 simply represents a moment in time in the life of a given cell.

429         The present study also has limitations. The expression of the focal gene set of ion  
430 channels, receptors, gap junction innexins, and neurotransmitter-related transcripts examined in  
431 this study ultimately discriminated neuron types fairly well, using supervised methods taking into  
432 account known neuron identity. This same gene set did not perform well in the same cell types  
433 using RNA-seq (Fig. 6), where a lack of low-abundance transcripts (such as transcription factors  
434 and ion channels) may have prevented us from robustly identifying cell-type-specific expression  
435 patterns; thus, depth of sequencing is always an ambiguity in every RNA-seq study (73).  
436 Furthermore, while we sampled the mRNA transcriptome of individual neurons, we have not

437 measured other gene products that could drive unique identity, including non-coding RNA  
438 species such as miRNA and lncRNA (74). Epigenetic modifications have also been implicated in  
439 neuronal cell identity (75), which were not considered in this study. Further, there are numerous  
440 other methods and statistical analyses being applied to molecular profiles to distinguish cell  
441 type. We focus on the more commonly employed analyses (PCA, hierarchical clustering,  
442 machine learning algorithms) in the literature. Finally, although we are confident in our ability to  
443 identify and harvest the targeted neuron types, we cannot rule out the possibility of an  
444 occasional misidentified or wrongly isolated cell, as well as the potential presence of adherent  
445 support cells.

446         This study reveals the inherent circularity of the problem facing researchers using  
447 transcriptome profiling to identify cell types: molecular profiling is most effective when cells are  
448 separated into distinct types *a priori*, yet this is often not possible in many systems. So then how  
449 can we most effectively use molecular profiling on unknown populations of cells? The clear  
450 answer is to provide as much multimodal data as possible in the analysis. Here, the additional  
451 data were an *a priori* separation into cell type based on electrophysiological output, synaptic  
452 connectivity, axonal projection, and muscle innervation target (76). While it has been more  
453 difficult to achieve multimodal data integration in systems such as cortex, the approach is  
454 gaining traction and proving effective. For example, supervised clustering methods proved  
455 superior to unsupervised algorithms in separating pyramidal neurons from interneurons in the  
456 mouse neocortex based on morphological phenotypes (77). Genetically- and anatomically-  
457 defined cell populations in the mouse cortex have revealed much finer resolution and  
458 confidence in molecular profiling (51). Much like a circuit's connectome alone is insufficient to  
459 predict network output and function (78), so too the transcriptome alone is insufficient to  
460 generate a definitive cell type. Yet it also is clear that transcriptome profiling provides valuable

461 insight into understanding the functional role of individual neurons and neuron types in a  
462 network.

463

## 464 **METHODS**

### 465 **Tissue collection and RNA preparation**

466 Adult Jonah Crabs, *Cancer borealis*, were purchased from the Fresh Lobster Company  
467 (Gloucester, Massachusetts, USA) and Commercial Lobster (Boston, MA). Animals were kept in  
468 filtered artificial seawater tanks chilled at 10–13°C on a 12/12 light:dark cycle. Prior to  
469 dissection, crabs were put on ice for 30 minutes to induce anesthetization. The complete  
470 stomatogastric nervous system (STNS) was dissected and pinned out in a dish coated in  
471 Sylgard (Dow Corning) with chilled (12°C) physiological saline (composition in mM/l: 440.0  
472 NaCl, 20.0 MgCl<sub>2</sub>, 13.0 CaCl<sub>2</sub>, 11.0 KCl, 11.2 Trizma base, and 5.1 maleic acid pH = 7.4 at 23  
473 °C. in RNase-free water). Following desheathing of the stomatogastric ganglion (STG), neurons  
474 were identified by simultaneous intra- and extracellular recordings (79, 80). Ten neuron types  
475 identified in the STG of *C borealis* were targeted for this study: PD (pyloric dilator), LPG (lateral  
476 posterior gastric), LP (lateral pyloric), IC (inferior cardiac), LG (lateral gastric), MG (medial  
477 gastric), GM, (gastric mill), PY (pyloric), VD (ventricular dilator), and DG (dorsal gastric).  
478 Identified neurons were extracted as previously described (81). Briefly, a Vaseline well was  
479 constructed around the ganglion, in which ~2.5 mg/ml protease (Sigma – P6911, St. Louis, MO)  
480 was added to disrupt connective tissue and loosen adherent support cells during a 10-15 minute  
481 incubation. The well was then thoroughly washed with fresh physiological saline to halt further  
482 enzymatic activity and remove any loose support or connective cells, and a 70% solution of  
483 chilled ethylene glycol in saline was added to the well. The saline outside the well was replaced  
484 with distilled water, and the entire dish was frozen at -20°C for 30 minutes. This kept the STG  
485 neurons cold during the removal of identified neurons. Due to the large size of *C. borealis* STG

486 neuronal somata (50-150  $\mu$ M in diameter) (82), fine forceps were used to manually remove each  
487 neuron. Identified neurons (Fig. 1) were immediately placed in a cryogenic microcentrifuge tube  
488 containing 400  $\mu$ L lysis buffer (Zymo Research) and stored at -80°C until RNA extraction. Total  
489 RNA was extracted using the Quick-RNA MicroPrep kit (Zymo Research) per the  
490 manufacturer's protocol.

491

## 492 **Library Preparation and Single-Cell RNA-Seq**

493 Library construction and RNA sequencing services were carried out by the University of Texas  
494 at Austin Genomic Sequencing and Analysis Facility (Austin, TX, USA). Extracted single cell  
495 RNA from identified neurons from the STG was used to generate cDNA libraries using TruSeq  
496 Stranded mRNA Library Prep Kit (Illumina, San Diego, California, USA). Libraries were  
497 sequenced in a paired-end 150 bp (2x150bp) configuration on the NextSeq 500 Illumina  
498 platform (Illumina, San Diego, CA, USA). Raw reads were processed and analyzed on the  
499 Stampede Cluster at the Texas Advanced Computing Facility (TACC). Read quality was  
500 checked using the program FASTQC. Low quality reads and adapter sequences were removed  
501 using the program Cutadapt (Martin, 2011). The forty identified neurons used in this study all  
502 had at least 4 million uniquely mapped reads per sample, comprising 11 PD, 11 GM, 8 LP, and  
503 8 VD cell types. These sequencing reads are deposited in the National Center for Biotechnology  
504 Information BioProject archive (PRJNA524309) with the following identifiers: BioSample:  
505 SAMN11022125; Sample name: STG Neurons; SRA: SRS4411333.

506

## 507 **Mapping and Differential Expression**

508 The software package Kallisto (83) (v0.43.1) was used in the quantification of RNA-seq  
509 abundances through the generation of pseudo-alignments of paired-end fastq files to the *C.*  
510 *borealis* annotated nervous system transcriptome (47). Bootstrapping of the quantification was

511 performed iteratively for 100 rounds. Resulting counts were normalized through the transcripts  
512 per kilobase million (TPM) method. Differential expression analysis was carried out using the  
513 software package Sleuth (84) (v0.30.0) using TPM normalized counts for each cell type.

514

### 515 **Gene Ontology Enrichment Analysis**

516 Since *C. borealis* lacks a well-curated reference genome, GO terms were assigned to  
517 the *C. borealis* transcriptome based on best BLASTX hits through reciprocal queries between  
518 crab sequence and the *Drosophila melanogaster* NCBI RefSeq database (Release 93). BLAST  
519 annotation was carried out based then on *Drosophila* protein sequence using the BLAST2GO  
520 (version 5.1) software suite with the blastx-fast alignment with an E value threshold = 1.0E-3 to  
521 generate *D. melanogaster* NCBI Gene IDs associated with each *C. borealis* contig. This  
522 produced 1348 and 252 annotated Gene IDs for the H2K and HVG datasets, respectively.  
523 These IDs were used as input for statistical overrepresentation tests using the PANTHER Gene  
524 Ontology Classification System (v14.1) with default settings using *D. melanogaster* as the  
525 reference species. Molecular Function and Biological Process GO terms were examined for  
526 enrichment in our datasets, and results reported reflect False Discovery Rate (FDR) correction  
527 except where noted.

528

### 529 **Multiplex Primer and Probe Design**

530 Multiplex primer and probe sequences targeting *C. borealis* genes were generated using  
531 the RealTimeDesign™ qPCR Assay Design Software from LGC Biosearch Technologies  
532 (Petaluma, CA) for custom assays. Multiplex cassettes were designed as a unit to ensure  
533 minimal interference in simultaneous qPCR reactions. Probe fluorophore/quencher pairs used in  
534 this study are as follows: FAM-BHQ1, CAL Fluor Gold 540-BHQ1, CAL Fluor Red 610-BHQ2,

535 Quasar 670-BHQ2 and Quasar 705-BHQ2. Forward and reverse primer pair, as well as  
536 associated probe, sequences can be found in Table S7.

537

### 538 **cDNA synthesis and pre-amplification**

539 Following RNA extraction, individual neuron RNA samples were reverse transcribed into  
540 cDNA using qScript cDNA SuperMix (QuantaBio, Beverly, MA, USA) primed with random  
541 hexamers and oligo-dT per the manufacturer's protocol in 20  $\mu$ L reactions. Half of each resulting  
542 cDNA pool (10  $\mu$ L) was pre-amplified using PerfeCTa PreAmp Supermix (QuantaBio) with a 14-  
543 cycle RT-PCR reaction primed with a pool of target-specific primers (Table S7) in a 20  $\mu$ L  
544 reaction per the manufacturer's protocol to allow for enough product to carry out 15 multiplex  
545 qPCR reactions per individual neuron sample. Amplified and unamplified target abundances  
546 were compared to ensure minimal amplification bias in the pre-amplification of samples (Fig.  
547 S1).

548

### 549 **Quantitative single-cell RT-PCR**

550 Following preamplification of cDNA, samples were diluted 7.5x in nuclease-free water  
551 (150  $\mu$ L final volume) to allow for the quantification of 73 unique gene products across 15  
552 multiplex assays, each able to measure 4-5 different transcripts (Table S7). Reactions were  
553 carried out in triplicate on 96-well plates with 10  $\mu$ L reactions per well using a CFX96 Touch™  
554 Real-Time PCR Detection System from Bio-Rad (Hercules, CA, USA). Cycling conditions for  
555 qPCR reactions were as follows: 95°C for 3 min; 40 cycles of 95°C for 15 sec and 58°C for 1  
556 min. Fluorescent measurements were taken at the end of each cycle. The final concentration of  
557 primers in each multiplex qPCR reaction was 2.5  $\mu$ M and 0.3125  $\mu$ M for each probe.

558 To quantify absolute mRNA abundances, standard curves were developed for each RT-  
559 qPCR multiplex assay using custom gBlock gene fragments (Integrated DNA Technologies,

560 Coralville, IA, USA). Standard curves were generated using a serial dilution of gBlock gene  
561 fragments from  $1 \times 10^6$  to  $1 \times 10^1$  copies for each reaction assay and were shown to be linear  
562 and reproducible. Copy numbers were calculated using the efficiency and slope generated from  
563 the standard curves and accounting for the 14-cycle preamplification and subsequent cDNA  
564 dilution described above.

565

## 566 **Statistical Analysis**

567 All statistical analyses were performed using R version 3.5.3 (2019-03-11) -- "Great  
568 Truth" (85). We used single cell RNA-seq data to evaluate our methods under expected and  
569 near best case scenarios. To this end, we reduced the dimensionality of the data (28,695  
570 contigs) by selecting the 2000 most variable contig and by selecting 922 highly variable contigs  
571 selected using the M3Drop implementation of the Brennecke method (48) (i.e. `M3Drop::`  
572 `BrenneckeGetVariableGenes()` (86) ) assuming a 0.2 false discovery rate. To test performance  
573 under ideal conditions we selected those contigs differentially expressed at an alpha of 0.2 or  
574 0.05. We centered and scaled the aforementioned datasets and their progenitors via the  
575 `caret::predict()` and `caret::preprocess()` functions (87). We also tested dimensionality reduction  
576 via PCA. We further used PCA in exploratory data analysis to determine if any of the cell types  
577 were visually separable across four subsets of the data (Seq H2K, Seq HVG, Seq DE0.2, and  
578 Seq DE0.05).

579 Next, we performed cluster estimation using the `optClust()` function of the `optCluster`  
580 package (49). The algorithms used on each dataset varied by whether the data were counts or  
581 continuous. Allowed k values ranged from 2-10 (i.e. cells in dataset / 4, rounding up). We  
582 selected the top three predicted k values from each algorithm for visualization of the spread of  
583 predicted ks.

584 To assess the performance of unsupervised machine learning methods on our data we  
585 tested several clustering algorithms – k-means clustering, hierarchical clustering (using a variety  
586 of distance metrics, (euclidean, maximum, manhattan, canberra, binary, minkowski, correlation,  
587 uncentered) and clustering methods (ward.D, ward.D2, single, complete, average, mcquitty,  
588 median, centroid, ward.D2)), and SNN-Cliq clustering (88). We then selected high performing  
589 clustering methods based on the Jaccard index calculated against cell identity. We selected one  
590 of the best performing combinations (Ward's method with correlation as the distance metric) for  
591 visualization.

592 We applied several supervised machine learning methods to evaluate predictive power  
593 of expression data in ideal circumstances (i.e. prior knowledge of a given cell type's molecular  
594 identity). Specifically, we tested elastic regression, k-nearest neighbors, linear discriminant  
595 analysis, neural network, multinomial neural network, random forest, support vector machine  
596 with a radial kernel, and support vector machine with a linear kernel. For each of these models  
597 we tested a variety of tuning parameters and selected the most effective parameter set before  
598 comparison with other methods. Methods were evaluated by using cross validation (with five  
599 folds) to produce the expected accuracy on new data. The same approaches were applied to  
600 the single cell RT-qPCR data set, with a few caveats. Given its relatively smaller size,  
601 dimensionality reduction was not necessary to overcome technical or practical hurdles. Thus,  
602 we tested both the raw and centered and scaled dataset in addition to PCA transformations of  
603 the same. We also increased the maximum k allowed in cluster estimation to 32.

604

605



606 **DECLARATIONS**

607 **Availability of Data and Material**

608 All sequence data accession numbers are provided in the manuscript and accompanying tables.

609 **Competing Interests**

610 The authors declare that they have no competing interests.

611 **Funding**

612 This work was supported by National Institutes of Health grants R01MH046742-29 (EM and  
613 DJS) and NIGMS T32GM008396 (support for AJN).

614 **Authors Contributions**

615 Conceived the study: DJS, EM, HAH. Tissue collection: AJN, AGO, JMS, RMH. Performed  
616 qPCR assays: AJN. Design of Primers: AJN, DJS. RNA-seq analysis: BMG, AJN, DRK, DJS,  
617 HAH, RMH. Data analysis: AJN, DRK, DJS. Interpretation of results: AJN, DRK, DJS, EM, HAH.  
618 Wrote the manuscript: AJN, DRK, DJS, EM, HAH. All authors read and approved the final  
619 manuscript.

620 **Acknowledgements**

621 We would like to thank members of the Schulz and Hofmann labs for helpful discussions. The  
622 authors thank the Genomic Sequencing and Analysis Facility at UT Austin for library preparation  
623 and sequencing and the bioinformatics consulting team at the UT Austin Center for  
624 Computational Biology and Bioinformatics for helpful advice.

625

626

627 **REFERENCES**

- 628 1. Masland RH (2004) Neuronal cell types. *Curr Biol* 14(13):R497–R500.
- 629 2. Zeng H, Sanes JR (2017) Neuronal cell-type classification: challenges, opportunities and the path  
630 forward. *Nat Rev Neurosci* 18(9):530–546.
- 631 3. Tasic B (2018) Single cell transcriptomics in neuroscience: cell classification and beyond. *Curr*  
632 *Opin Neurobiol* 50:242–249.
- 633 4. Stevens CF (1998) Neuronal diversity: too many cell types for comfort? *Curr Biol* 8(20):R708-10.
- 634 5. Cuevas-Diaz Duran R, Wei H, Wu JQ (2017) Single-cell RNA-sequencing of the brain. *Clin Transl*  
635 *Med* 6(1):20.
- 636 6. Luo L, Callaway EM, Svoboda K (2018) Genetic Dissection of Neural Circuits: A Decade of  
637 Progress. *Neuron* 98(2):256–281.
- 638 7. Tessmar-Raible K, et al. (2007) Conserved sensory-neurosecretory cell types in annelid and fish  
639 forebrain: insights into hypothalamus evolution. *Cell* 129(7):1389–400.
- 640 8. Tomer R, Denes AS, Tessmar-Raible K, Arendt D (2010) Profiling by Image Registration Reveals  
641 Common Origin of Annelid Mushroom Bodies and Vertebrate Pallium. *Cell* 142(5):800–809.
- 642 9. Mehta P, et al. (2019) Functional Access to Neuron Subclasses in Rodent and Primate Forebrain.  
643 *Cell Rep* 26(10):2818–2832.e8.
- 644 10. Whitaker KW, et al. (2011) Serotonergic modulation of startle-escape plasticity in an African cichlid  
645 fish: a single-cell molecular and physiological analysis of a vital neural circuit. *J Neurophysiol*  
646 106(1):127–37.
- 647 11. Ho H, et al. (2018) A Guide to Single-Cell Transcriptomics in Adult Rodent Brain: The Medium  
648 Spiny Neuron Transcriptome Revisited. *Front Cell Neurosci* 12:159.
- 649 12. Parmhans N, Sajgo S, Niu J, Luo W, Badea TC (2018) Characterization of retinal ganglion cell,  
650 horizontal cell, and amacrine cell types expressing the neurotrophic receptor tyrosine kinase Ret. *J*

- 651            *Comp Neurol* 526(4):742–766.
- 652    13.    Shrestha BR, et al. (2018) Sensory Neuron Diversity in the Inner Ear Is Shaped by Activity. *Cell*  
653            174(5):1229–1246.e17.
- 654    14.    Chung S, et al. (2017) Identification of preoptic sleep neurons using retrograde labelling and gene  
655            profiling. *Nature* 545(7655):477–481.
- 656    15.    Södersten E, et al. (2018) A comprehensive map coupling histone modifications with gene  
657            regulation in adult dopaminergic and serotonergic neurons. *Nat Commun* 9(1):1226.
- 658    16.    Cadwell CR, et al. (2015) Electrophysiological, transcriptomic and morphologic profiling of single  
659            neurons using Patch-seq. *Nat Biotechnol* 34(2):199–203.
- 660    17.    Zeisel A, et al. (2015) Brain structure. Cell types in the mouse cortex and hippocampus revealed  
661            by single-cell RNA-seq. *Science* 347(6226):1138–42.
- 662    18.    Boldog E, et al. (2018) Transcriptomic and morphophysiological evidence for a specialized human  
663            cortical GABAergic cell type. *Nat Neurosci* 21(9):1185–1195.
- 664    19.    Eberwine J, et al. (1992) Analysis of gene expression in single live neurons. *Proc Natl Acad Sci U*  
665            *S A* 89(7):3010–4.
- 666    20.    Tietjen I, et al. (2003) Single-cell transcriptional analysis of neuronal progenitors. *Neuron*  
667            38(2):161–75.
- 668    21.    Esumi S, et al. (2008) Method for single-cell microarray analysis and application to gene-  
669            expression profiling of GABAergic neuron progenitors. *Neurosci Res* 60(4):439–451.
- 670    22.    Tang F, et al. (2009) mRNA-Seq whole-transcriptome analysis of a single cell. *Nat Methods*  
671            6(5):377–382.
- 672    23.    Davie K, et al. (2018) A Single-Cell Transcriptome Atlas of the Aging Drosophila Brain. *Cell*  
673            174(4):982–998.e20.
- 674    24.    Poulin J-F, Tasic B, Hjerling-Leffler J, Trimarchi JM, Awatramani R (2016) Disentangling neural

- 675 cell diversity using single-cell transcriptomics. *Nat Neurosci* 19(9):1131–41.
- 676 25. Tasic B, et al. (2016) Adult mouse cortical cell taxonomy revealed by single cell transcriptomics.  
677 *Nat Neurosci* 19(2):335–46.
- 678 26. Trapnell C (2015) Defining cell types and states with single-cell genomics. *Genome Res*  
679 25(10):1491–1498.
- 680 27. Haas BJ, et al. (2013) De novo transcript sequence reconstruction from RNA-seq using the Trinity  
681 platform for reference generation and analysis. *Nat Protoc* 8(8):1494–512.
- 682 28. Cembrowski MS, Wang L, Sugino K, Shields BC, Spruston N (2016) Hipposeq: a comprehensive  
683 RNA-seq database of gene expression in hippocampal principal neurons. *Elife* 5:e14997.
- 684 29. Wagner A, Regev A, Yosef N (2016) Revealing the vectors of cellular identity with single-cell  
685 genomics. *Nat Biotechnol* 34(11):1145–1160.
- 686 30. Gokce O, et al. (2016) Cellular Taxonomy of the Mouse Striatum as Revealed by Single-Cell RNA-  
687 Seq. *Cell Rep* 16(4):1126–1137.
- 688 31. Doyle JP, et al. (2008) Application of a Translational Profiling Approach for the Comparative  
689 Analysis of CNS Cell Types. *Cell* 135(4):749–762.
- 690 32. Zhou T, Matsunami H (2018) Lessons from single-cell transcriptome analysis of oxygen-sensing  
691 cells. *Cell Tissue Res* 372(2):403–415.
- 692 33. Crocker A, Guan X-J, Murphy CT, Murthy M (2016) Cell-Type-Specific Transcriptome Analysis in  
693 the *Drosophila* Mushroom Body Reveals Memory-Related Changes in Gene Expression. *Cell Rep*  
694 15(7):1580–1596.
- 695 34. Macosko EZ, et al. (2015) Highly Parallel Genome-wide Expression Profiling of Individual Cells  
696 Using Nanoliter Droplets. *Cell* 161(5):1202–1214.
- 697 35. Usoskin D, et al. (2015) Unbiased classification of sensory neuron types by large-scale single-cell  
698 RNA sequencing. *Nat Neurosci* 18(1):145–53.

- 699 36. Shin J, Ming G, Song H (2014) Decoding neural transcriptomes and epigenomes via high-  
700 throughput sequencing. *Nat Neurosci* 17(11):1463–75.
- 701 37. Rosenberg AB, et al. (2018) Single-cell profiling of the developing mouse brain and spinal cord  
702 with split-pool barcoding. *Science* (80- ) 360(6385):176–182.
- 703 38. Reuter JA, Spacek D V., Snyder MP (2015) High-Throughput Sequencing Technologies. *Mol Cell*  
704 58(4):586–597.
- 705 39. Kelley KW, Nakao-Inoue H, Molofsky A V., Oldham MC (2018) Variation among intact tissue  
706 samples reveals the core transcriptional features of human CNS cell classes. *Nat Neurosci*  
707 21(9):1171–1184.
- 708 40. Hobert O, Carrera I, Stefanakis N (2010) The molecular and gene regulatory signature of a  
709 neuron. *Trends Neurosci* 33(10):435–45.
- 710 41. Sha Y, Phan JH, Wang MD (2015) Effect of low-expression gene filtering on detection of  
711 differentially expressed genes in RNA-seq data. *Conf Proc . Annu Int Conf IEEE Eng Med Biol*  
712 *Soc IEEE Eng Med Biol Soc Annu Conf* 2015:6461–4.
- 713 42. van den Brink SC, et al. (2017) Single-cell sequencing reveals dissociation-induced gene  
714 expression in tissue subpopulations. *Nat Methods* 14(10):935–936.
- 715 43. Harris RM, Kao H-Y, Alarcon JM, Hofmann HA, Fenton AA (2019) Hippocampal transcriptomic  
716 responses to enzyme-mediated cellular dissociation. *Hippocampus*:hipo.23095.
- 717 44. Tasic B, et al. (2018) Shared and distinct transcriptomic cell types across neocortical areas.  
718 *Nature* 563(7729):72–78.
- 719 45. Peng Y-R, et al. (2019) Molecular Classification and Comparative Taxonomics of Foveal and  
720 Peripheral Cells in Primate Retina. *Cell* 176(5):1222–1237.e22.
- 721 46. Ziegenhain C, et al. (2017) Comparative Analysis of Single-Cell RNA Sequencing Methods. *Mol*  
722 *Cell* 65(4):631–643.e4.

- 723 47. Northcutt AJ, et al. (2016) Deep sequencing of transcriptomes from the nervous systems of two  
724 decapod crustaceans to characterize genes important for neural circuit function and modulation.  
725 *BMC Genomics* 17(1):868.
- 726 48. Brennecke P, et al. (2013) Accounting for technical noise in single-cell RNA-seq experiments. *Nat*  
727 *Methods* 10(11):1093–1098.
- 728 49. Sekula M, Datta S, and Susmita Datta (2017) optCluster: Determine Optimal Clustering Algorithm  
729 and Number of Clusters.
- 730 50. Mi H, Muruganujan A, Thomas PD (2012) PANTHER in 2013: modeling the evolution of gene  
731 function, and other gene attributes, in the context of phylogenetic trees. *Nucleic Acids Res*  
732 41(D1):D377–D386.
- 733 51. Sugino K, et al. (2019) Mapping the transcriptional diversity of genetically and anatomically  
734 defined cell populations in the mouse brain. *Elife* 8. doi:10.7554/elife.38619.
- 735 52. Schulz DJ, Goillard J-M, Marder EE (2007) Quantitative expression profiling of identified neurons  
736 reveals cell-specific constraints on highly variable levels of gene expression. *Proc Natl Acad Sci U*  
737 *S A* 104(32):13187–91.
- 738 53. Temporal S, Lett KM, Schulz DJ (2014) Activity-dependent feedback regulates correlated ion  
739 channel mRNA levels in single identified motor neurons. *Curr Biol* 24(16):1899–1904.
- 740 54. Santin JM, Schulz DJ (2019) Membrane Voltage Is a Direct Feedback Signal That Influences  
741 Correlated Ion Channel Expression in Neurons. *Curr Biol* 29(10):1683–1688.e2.
- 742 55. Li H, et al. (2017) Classifying Drosophila Olfactory Projection Neuron Subtypes by Single-Cell  
743 RNA Sequencing. *Cell* 171(5):1206–1220.e22.
- 744 56. Paul A, et al. (2017) Transcriptional Architecture of Synaptic Communication Delineates  
745 GABAergic Neuron Identity. *Cell* 171(3):522–539.e20.
- 746 57. Deneris ES, Hobert O (2014) Maintenance of postmitotic neuronal cell identity. *Nat Neurosci*  
747 17(7):899–907.

- 748 58. Sanes JR, Masland RH (2015) The Types of Retinal Ganglion Cells: Current Status and  
749 Implications for Neuronal Classification. *Annu Rev Neurosci* 38(1):221–246.
- 750 59. Hobert O, Glenwinkel L, White J (2016) Revisiting Neuronal Cell Type Classification in  
751 *Caenorhabditis elegans*. *Curr Biol* 26(22):R1197–R1203.
- 752 60. Harris TW, et al. (2014) WormBase 2014: new views of curated biology. *Nucleic Acids Res*  
753 42(D1):D789–D793.
- 754 61. Li G-W, Xie XS (2011) Central dogma at the single-molecule level in living cells. *Nature*  
755 475(7356):308–315.
- 756 62. Raj A, van Oudenaarden A (2008) Nature, Nurture, or Chance: Stochastic Gene Expression and  
757 Its Consequences. *Cell* 135(2):216–226.
- 758 63. Wang Y, Ni T, Wang W, Liu F (2018) Gene transcription in bursting: a unified mode for realizing  
759 accuracy and stochasticity. *Biol Rev*. doi:10.1111/brv.12452.
- 760 64. Symmons O, Raj A (2016) What's Luck Got to Do with It: Single Cells, Multiple Fates, and  
761 Biological Nondeterminism. *Mol Cell* 62(5):788–802.
- 762 65. Perez-Ortin JE (2008) Genomics of mRNA turnover. *Briefings Funct Genomics Proteomics*  
763 6(4):282–291.
- 764 66. Benito E, Barco A (2015) The Neuronal Activity-Driven Transcriptome. *Mol Neurobiol* 51(3):1071–  
765 1088.
- 766 67. Llorens-Bobadilla E, et al. (2015) Single-Cell Transcriptomics Reveals a Population of Dormant  
767 Neural Stem Cells that Become Activated upon Brain Injury. *Cell Stem Cell* 17(3):329–340.
- 768 68. Olivera-Martinez I, et al. (2014) Major transcriptome re-organisation and abrupt changes in  
769 signalling, cell cycle and chromatin regulation at neural differentiation in vivo. *Development*  
770 141(16):3266–3276.
- 771 69. Moroz LL, Kohn AB (2013) Single-Neuron Transcriptome and Methylome Sequencing for

- 772 Epigenomic Analysis of Aging. *Methods in Molecular Biology (Clifton, N.J.)*, pp 323–352.
- 773 70. Brennecke P, et al. (2013) Accounting for technical noise in single-cell RNA-seq experiments. *Nat*  
774 *Methods* 10(11):1093–1095.
- 775 71. Tasic B, Levi BP, Menon V (2017) Single-Cell Transcriptomic Characterization of Vertebrate Brain  
776 Composition, Development, and Function. *Decoding Neural Circuit Structure and Function*  
777 (Springer International Publishing, Cham), pp 437–468.
- 778 72. Cembrowski MS, Menon V (2018) Continuous Variation within Cell Types of the Nervous System.  
779 *Trends Neurosci* 41(6):337–348.
- 780 73. Rizzetto S, et al. (2017) Impact of sequencing depth and read length on single cell RNA  
781 sequencing data of T cells. *Sci Rep* 7(1):12781.
- 782 74. Sheng K, Cao W, Niu Y, Deng Q, Zong C (2017) Effective detection of variation in single-cell  
783 transcriptomes using MATQ-seq. *Nat Methods* 14(3):267–270.
- 784 75. Mito M, et al. (2018) Cell Type-Specific Survey of Epigenetic Modifications by Tandem Chromatin  
785 Immunoprecipitation Sequencing. *Sci Rep* 8(1):1143.
- 786 76. Marder E, Bucher D (2007) Understanding circuit dynamics using the stomatogastric nervous  
787 system of lobsters and crabs. *Annu Rev Physiol* 69:291–316.
- 788 77. Guerra L, et al. (2011) Comparison between supervised and unsupervised classifications of  
789 neuronal cell types: A case study. *Dev Neurobiol* 71(1):71–82.
- 790 78. Gutierrez GJ, O’Leary T, Marder E (2013) Multiple Mechanisms Switch an Electrically Coupled,  
791 Synaptically Inhibited Neuron between Competing Rhythmic Oscillators. *Neuron* 77(5):845–858.
- 792 79. Hooper SL, et al. (1986) The innervation of the pyloric region of the crab, *Cancer borealis*:  
793 homologous muscles in decapod species are differently innervated. *J Comp Physiol A*  
794 159(2):227–40.
- 795 80. Weimann JM, Meyrand P, Marder E (1991) Neurons that form multiple pattern generators:



- 796 identification and multiple activity patterns of gastric/pyloric neurons in the crab stomatogastric  
797 system. *J Neurophysiol* 65(1):111–22.
- 798 81. Schulz DJ, Goaillard J-M, Marder E (2006) Variable channel expression in identified single and  
799 electrically coupled neurons in different animals. *Nat Neurosci* 9(3):356–62.
- 800 82. Ransdell JL, Faust TB, Schulz DJ (2010) Correlated Levels of mRNA and Soma Size in Single  
801 Identified Neurons: Evidence for Compartment-specific Regulation of Gene Expression. *Front Mol*  
802 *Neurosci* 3:116.
- 803 83. Bray NL, Pimentel H, Melsted P, Pachter L (2016) Near-optimal probabilistic RNA-seq  
804 quantification. *Nat Biotechnol* 34(5):525–527.
- 805 84. Pimentel H, Bray NL, Puente S, Melsted P, Pachter L (2017) Differential analysis of RNA-seq  
806 incorporating quantification uncertainty. *Nat Methods* 14(7):687–690.
- 807 85. R Core Team, Team RDC (2008) R: A Language and Environment for Statistical Computing.
- 808 86. Andrews T (2019) M3Drop: Michaelis-Menten Modelling of Dropouts in single-cell RNASeq.  
809 Available at: <https://github.com/tallulandrews/M3Drop>.
- 810 87. Kuhn M (2019) caret: Classification and Regression Training. R package version 6.0-84.
- 811 88. Xu C, Su Z (2015) Identification of cell types from single-cell transcriptomes using a novel  
812 clustering method. *Bioinformatics* 31(12):1974–1980.

## 813 **FIGURE LEGENDS**

814 **Figure 1. A)** Photomicrograph of the stomatogastric ganglion. Scale bar = 200  $\mu$ m. **B)** Circuit  
815 map of the stomatogastric ganglion (STG). The STG contains 12 cell types that innervate the  
816 pylorus and gastric mill of the crab stomach. These cells are individually identifiable, and their  
817 chemical (closed circles) and electrical (resistor symbols) synaptic connections are all known.  
818 We used 10 of these 12 STG cell types (not AB or INT1) for this study, as well as motor neurons  
819 of the cardiac ganglion as an outgroup for comparison. Example traces taken from intracellular

820 recordings of each the 11 identified neuron types used in this study. Neurons are involved in  
821 three different networks/circuits in the crab, *Cancer borealis*: the pyloric network (PD, LPG, LP,  
822 and PY; orange box), the gastric network (LG, DG, and GM; red box) and the cardiac ganglion  
823 network (bottom). Note the time scale difference in the long-lasting bursts of the gastric cells  
824 (red box) relative to the pyloric cells (orange box). Some neurons (IC, VD, and MG) participate  
825 in both gastric and pyloric network activity, and are noted in the purple box. Large Cell (LC)  
826 motor neurons of the cardiac ganglion are used as an “outgroup” to compare expression  
827 patterns of motor neurons from a distinct ganglion (cardiac ganglion). Each of the representative  
828 recordings is independent as an example of individual cell output, and simultaneous network  
829 activity is not plotted here. Thus, none of the phase relationships of these units within their  
830 respective rhythms is implied in any of the recordings.

831

832 **Figure 2.** Post-hoc recapitulation of cell identity via single cell RNA-seq with hierarchical  
833 clustering and supervised machine learning (sML) algorithms. **A)** Hierarchical clustering of cell  
834 type with correlation as the distance metric, Ward.D2 as the clustering method, and data  
835 centered and scaled by contig for all expressed contigs, **B)** Highly Variable Gene (HVG)  
836 dataset, and **C)** differentially expressed (DE) contigs at the  $q < 0.05$  level. Each cell type is color  
837 coded, and Approximately Unbiased (AU) p-values are noted for each of the major nodes. Cells  
838 are identified by type (LP, PD, GM, VD) and a subscript that denotes a unique sample identifier.  
839 **D)** Dotplot of the top 3 predicted number of clusters (k values) for eight algorithms. None of  
840 these algorithms correctly predicted the expected 4 distinct clusters that would represent the 4  
841 different cell types in this assay. **E)** Accuracy (proportion of correctly identified cells) of cell type  
842 prediction using 8 different methods of sML (generalized linear model (GLM), k-Nearest  
843 Neighbors (kNN), Neural Network (NN), Multinomial Neural Network (MNN), Random Forest  
844 (RF), Support Vector Machine with a linear kernel (SVML), Support Vector Machine with a radial

845 kernel (SVMR), and Linear Discriminant Analysis (LDA)) for each of the data sets. Box and  
846 whisker plots show the efficacy of these methods to recapitulate cell identity from these two sets  
847 of contigs as estimated by cross validation (5 folds). To assess the efficacy of these methods on  
848 the full RNA-seq dataset, we used principle component analysis (PCA) for dimensionality  
849 reduction (i.e. >28,000 contigs to 38 PCs) while retaining 99% of the variance. Results are  
850 shown for raw data (*top row*) and data scaled across contigs (*bottom row*).

851

852 **Figure 3.** Principal Component Analysis (PCA) for four different RNA-seq datasets. We  
853 performed PCA using **A)** the 2,000 contigs with the highest variance in expression (H2K), **B)** the  
854 Highly Variable Gene set (HVG), and differentially expressed (DE) contigs at the **C)**  $q < 0.2$   
855 (DE0.2) and **D)**  $q < 0.05$  (DE0.05) levels. For each panel we have plotted pairwise comparisons  
856 of PC1, PC2, and PC3, as well as a scree plot representing the percentage of variance  
857 explained by PCs 1-10.

858

859 **Figure 4.** Count numbers for selected voltage-gated ion channels from the RNA-seq data. The  
860 median counts for each of the voltage-gated channels used in the RT-PCR analysis was  
861 generated by pooling cell type. Innexins and the Na<sup>+</sup>/K<sup>+</sup> ATPase are used as a reference of  
862 more highly abundant gene products.

863

864 **Figure 5.** Post-hoc recapitulation of cell identity via qRT-PCR expression with hierarchical  
865 clustering and sML algorithms. **A)** Hierarchical clustering of cell type with correlation as the  
866 distance metric, and Ward.D2 as the clustering method for data centered and scaled across  
867 genes. Approximately Unbiased (AU) p-values for a given node are noted in red. Each node  
868 that has >80% support by AU p-value is color coded, and cell types that form a largely coherent

869 group are noted in bold. Cells that do not appear to cluster by type are noted in gray. Cells are  
870 identified by type and a subscript that denotes a unique sample identifier. **B)** Dotplot of the top 3  
871 predicted number of clusters based on 8 different prediction algorithms. None of these methods  
872 correctly predicted 11 distinct clusters that would represent the 11 different cell types in this  
873 assay. **C)** Accuracy of cell type prediction using 8 different methods of sML for each of the data  
874 sets. Box and whisker plots show efficacy of each method across five cross-validation folds. **D)**  
875 PCA for qRT-PCR data. Pairwise comparisons of PC1, PC2, and PC3 are shown in each panel  
876 as in Figure 3. PC1 accounted for 31.2% of the variance, PC2 accounted for 16.6%, and PC3  
877 accounted for 9.6% of the total variance across samples. A scree plot shows the amount of  
878 variance explained by PCs 1-10.

879

880 **Figure 6.** Comparison of expression levels and clustering between qRT-PCR and RNA-seq  
881 data. **A)** Expression levels of 4 different genes (Choline Acetyltransferase: *ChAT*, Vesicular  
882 Acetylcholine Transporter: *vAChT*, NMDA Receptor Subtype 2B: *NMDA2B*, and K<sup>+</sup> Two-Pore-  
883 Domain Channel Subfamily K Member 1: *KCNK1*) between the RNA-seq and qRT-PCR data  
884 sets. Data shown are medians, quartiles and each individual value from a given animal. Each  
885 individual data point is also represented as open circles. RNA-seq data are presented as  
886 Transcripts Per Kilobase Million (TPM) while qRT-PCR data as absolute copy number per cell.  
887 **B)** Hierarchical clustering comparison between qRT-PCR (*top*) and RNA-seq (*bottom*) for the  
888 same 65 genes represented in the genes of interest pool shown in Figure 1. Each cell type is  
889 color coded, and nodes are labeled with AU-values as in previous figures. **C)** PCA for scRNA-  
890 seq versus qRT-PCR channel and receptor data. Pairwise comparisons of PC1, PC2, and PC3  
891 are shown in each panel as in Figure 3.

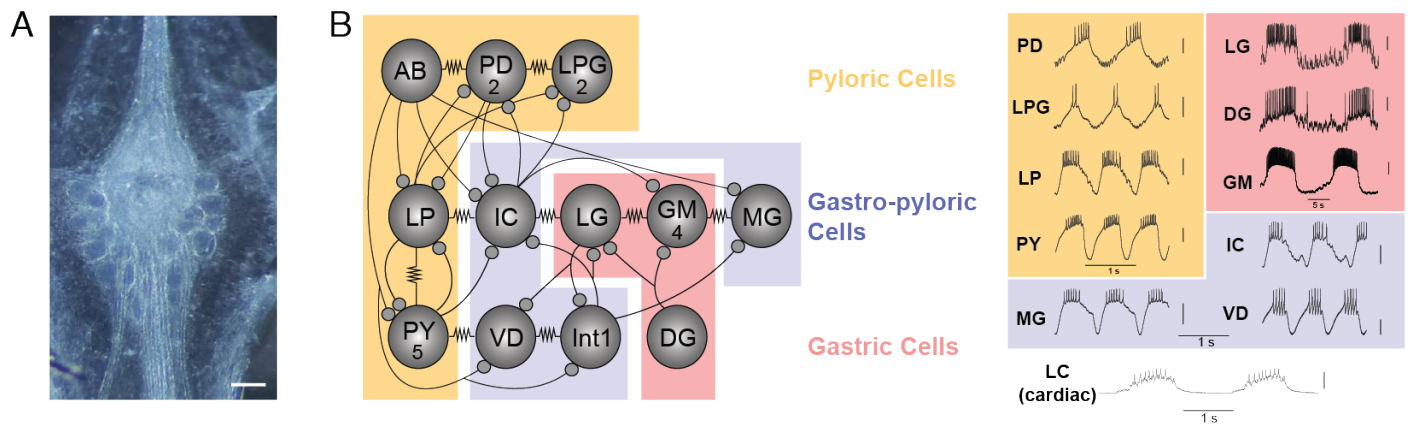

**Figure 1.** **A)** Photomicrograph of the stomatogastric ganglion. Scale bar = 200  $\mu\text{m}$ . **B)** Circuit map of the stomatogastric ganglion (STG). The STG contains 12 cell types that innervate the pylorus and gastric mill of the crab stomach. These cells are individually identifiable, and their chemical (closed circles) and electrical (resistor symbols) synaptic connections are all known. We used 10 of these 12 STG cell types (not AB or INT1) for this study, as well as motor neurons of the cardiac ganglion as an outgroup for comparison. Example traces taken from intracellular recordings of each the 11 identified neuron types used in this study. Neurons are involved in three different networks/circuits in the crab, *Cancer borealis*: the pyloric network (PD, LPG, LP, and PY; orange box), the gastric network (LG, DG, and GM; red box) and the cardiac ganglion network (bottom). Note the time scale difference in the long-lasting bursts of the gastric cells (red box) relative to the pyloric cells (orange box). Some neurons (IC, VD, and MG) participate in both gastric and pyloric network activity, and are noted in the purple box. Large Cell (LC) motor neurons of the cardiac ganglion are used as an “outgroup” to compare expression patterns of motor neurons from a distinct ganglion (cardiac ganglion). Each of the representative recordings is independent as an example of individual cell output, and simultaneous network activity is not plotted here. Thus, none of the phase relationships of these units within their respective rhythms is implied in any of the recordings.

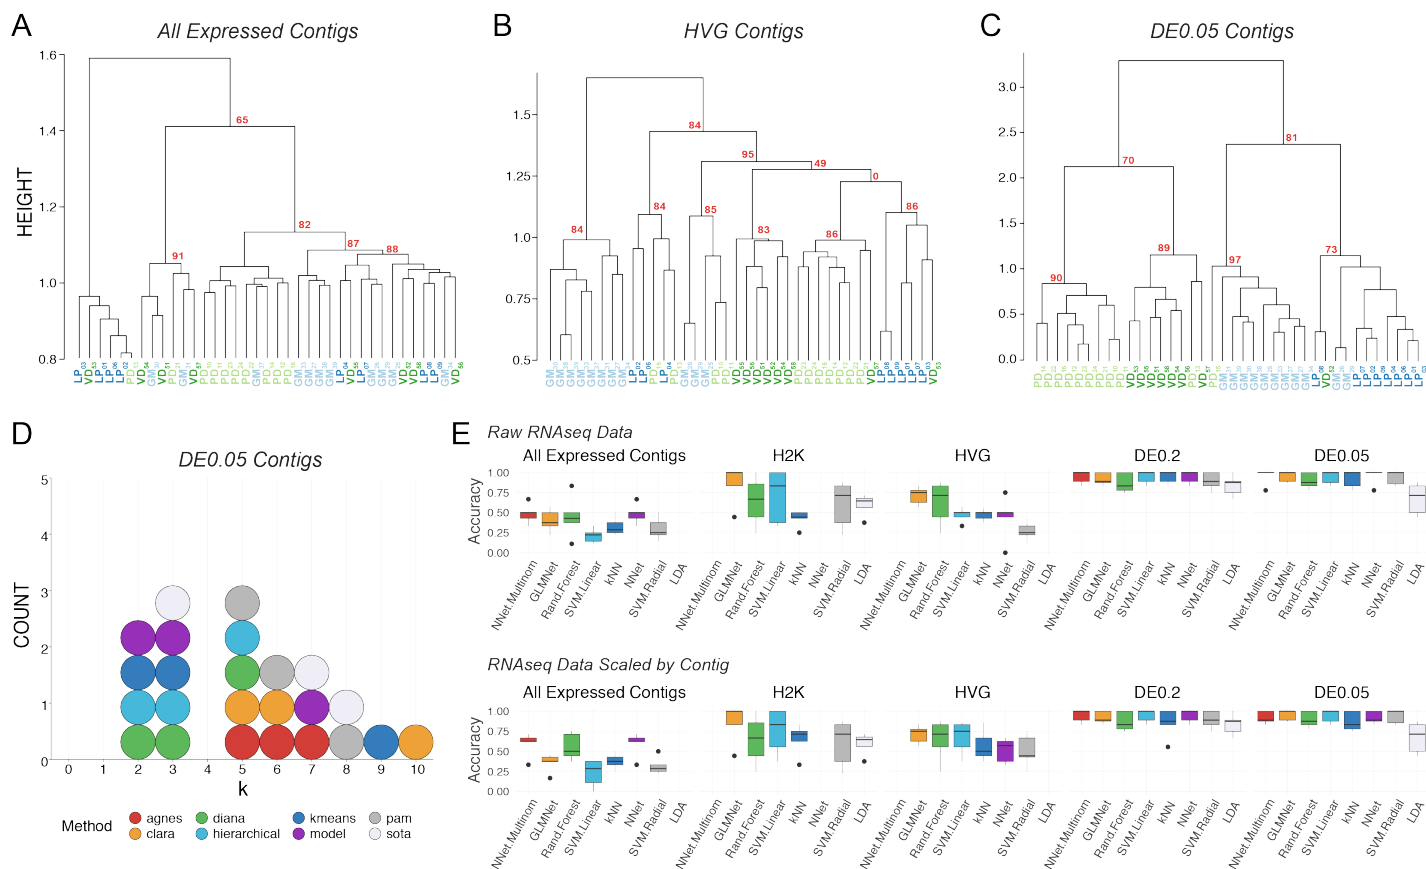

**Figure 2.** Post-hoc recapitulation of cell identity via single cell RNAseq with hierarchical clustering and supervised machine learning (sML) algorithms. **A)** Hierarchical clustering of cell type with correlation as the distance metric, Ward.D2 as the clustering method, and data centered and scaled by contig for all expressed contigs, **B)** Highly Variable Gene (HVG) dataset, and **C)** differentially expressed (DE) contigs at the  $q < 0.05$  level. Each cell type is color coded, and Approximately Unbiased (AU) p-values are noted for each of the major nodes. Cells are identified by type (LP, PD, GM, VD) and a subscript that denotes a unique sample identifier. **D)** Dotplot of the top 3 predicted number of clusters ( $k$  values) for eight algorithms. None of these algorithms correctly predicted the expected 4 distinct clusters that would represent the 4 different cell types in this assay. **E)** Accuracy (proportion of correctly identified cells) of cell type prediction using 8 different methods of sML (generalized linear model (GLM), k-Nearest Neighbors (kNN), Neural Network (NN), Multinomial Neural Network (MNN), Random Forest (RF), Support Vector Machine with a linear kernel (SVML), Support Vector Machine with a radial kernel (SVMR), and Linear Discriminant Analysis (LDA)) for each of the data sets. Box and whisker plots show the efficacy of these methods to recapitulate cell identity from these two sets of contigs as estimated by cross validation (5 folds). To assess the efficacy of these methods on the full RNA seq dataset, we used principle component analysis (PCA) for dimensionality reduction (i.e. >28,000 contigs to 38 PCs) while retaining 99% of the variance. Results are shown for raw data (*top row*) and data scaled across contigs (*bottom row*).

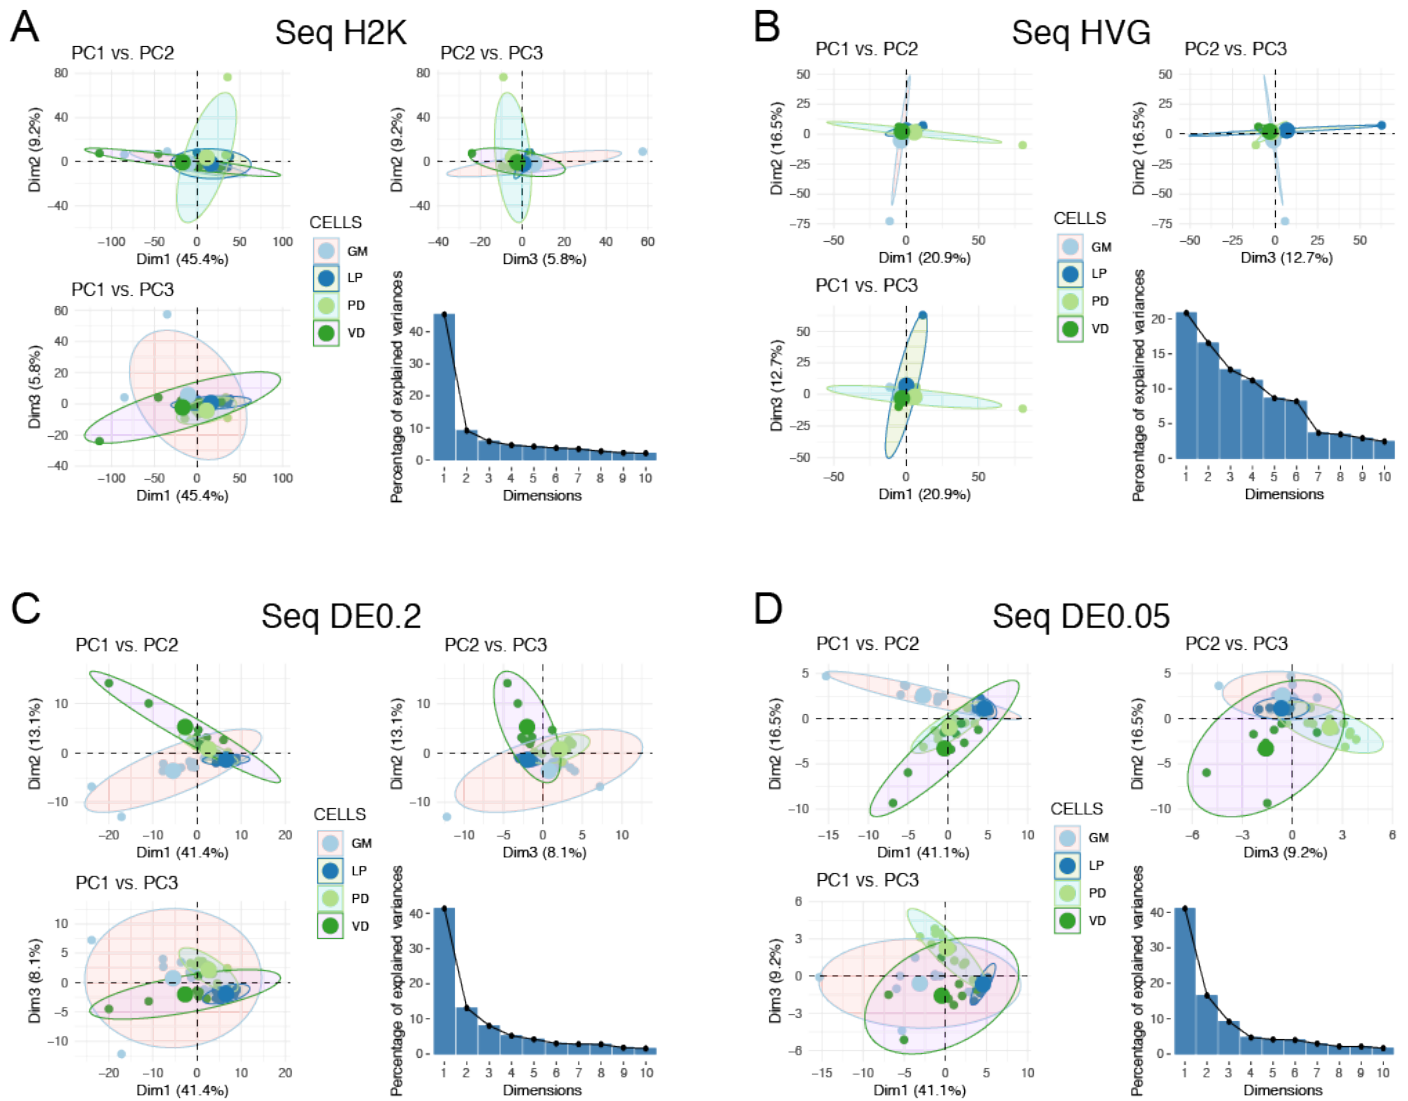

**Figure 3.** Principal Component Analysis (PCA) for four different RNAseq datasets. We performed PCA using **A)** the 2,000 contigs with the highest variance in expression (H2K), **B)** the Highly Variable Gene set (HVG), and differentially expressed (DE) contigs at the **C)**  $q < 0.2$  (DE0.2) and **D)**  $q < 0.05$  (DE0.05) levels. For each panel we have plotted pairwise comparisons of PC1, PC2, and PC3, as well as a scree plot representing the percentage of variance explained by PCs 1-10.

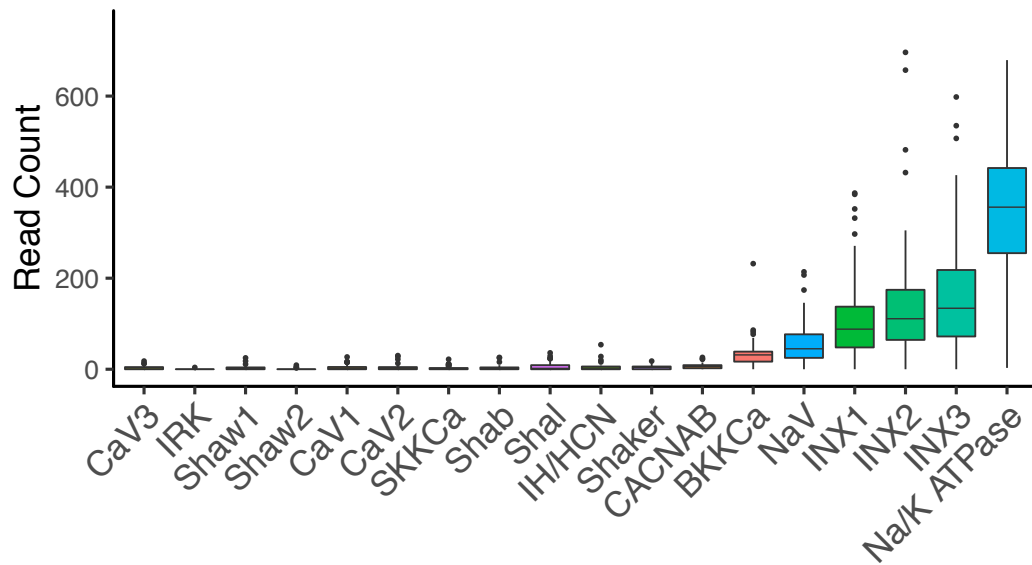

**Figure 4.** Count numbers for selected voltage-gated ion channels from the RNAseq data. The median counts for each of the voltage-gated channels used in the RT-PCR analysis was generated by pooling cell type. Innexins and the Na<sup>+</sup>/K<sup>+</sup> ATPase are used as a reference of more highly abundant gene products.



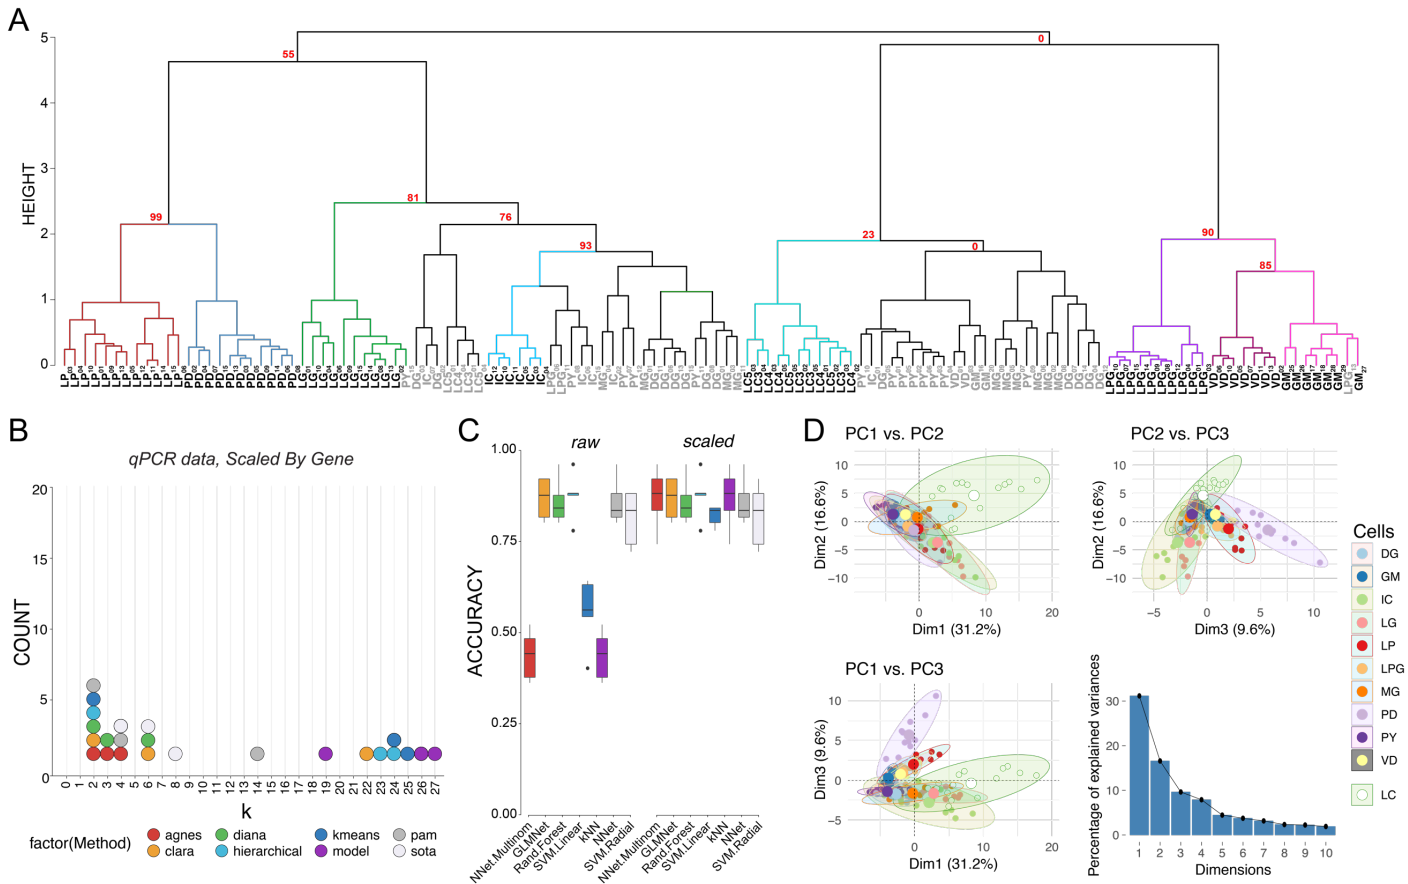

**Figure 5.** Post-hoc recapitulation of cell identity via qRT-PCR expression with hierarchical clustering and sML algorithms. **A)** Hierarchical clustering of cell type with correlation as the distance metric, and Ward.D2 as the clustering method for data centered and scaled across genes. Approximately Unbiased (AU) p-values for a given node are noted in red. Each node that has >80% support by AU p-value is color coded, and cell types that form a largely coherent group are noted in bold. Cells that do not appear to cluster by type are noted in gray. Cells are identified by type and a subscript that denotes a unique sample identifier. **B)** Dotplot of the top 3 predicted number of clusters based on 8 different prediction algorithms. None of these methods correctly predicted 11 distinct clusters that would represent the 11 different cell types in this assay. **C)** Accuracy of cell type prediction using 8 different methods of sML for each of the data sets. Box and whisker plots show efficacy of each method across five cross-validation folds. **D)** PCA for qRT-PCR data. Pairwise comparisons of PC1, PC2, and PC3 are shown in each panel as in Figure 3. PC1 accounted for 31.2% of the variance, PC2 accounted for 16.6%, and PC3 accounted for 9.6% of the total variance across samples. A scree plot shows the amount of variance explained by PCs 1-10.

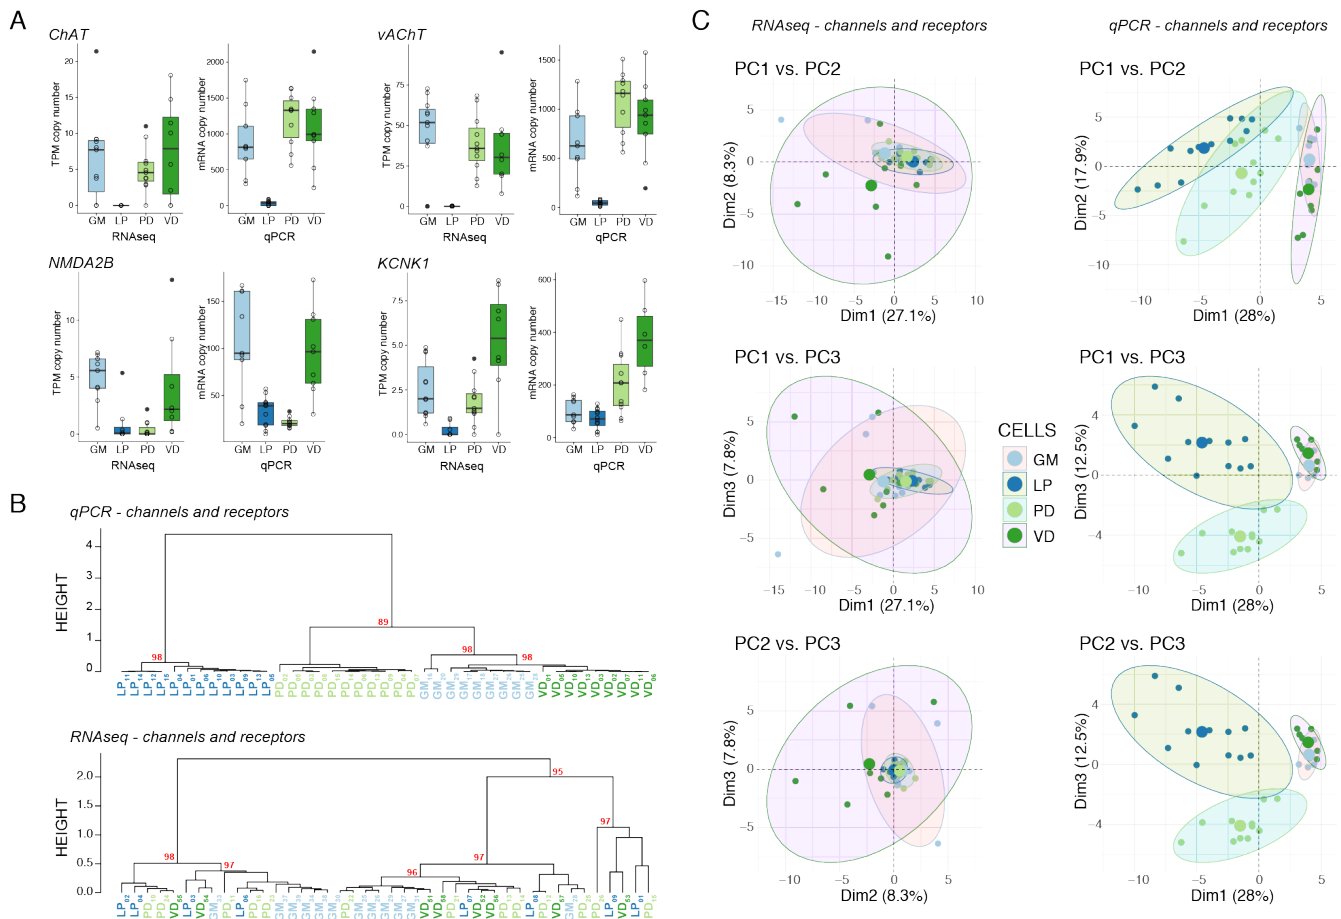

**Figure 6.** Comparison of expression levels and clustering between qRT-PCR and RNaseq data. **A)** Expression levels of 4 different genes (Choline Acetyltransferase: *ChAT*, Vesicular Acetylcholine Transporter: *vAChT*, NMDA Receptor Subtype 2B: *NMDA2B*, and K<sup>+</sup> Two-Pore-Domain Channel Subfamily K Member 1: *KCNK1*) between the RNaseq and qRT-PCR data sets. Data shown are medians, quartiles and each individual value from a given animal. Each individual data point is also represented as open circles. RNaseq data are presented as Transcripts Per Kilobase Million (TPM) while qRT-PCR data as absolute copy number per cell. **B)** Hierarchical clustering comparison between qRT-PCR (*top*) and RNaseq (*bottom*) for the same 65 genes represented in the genes of interest pool shown in Figure 1. Each cell type is color coded, and nodes are labeled with AU-values as in previous figures. **C)** PCA for scRNA-seq versus qRT-PCR channel and receptor data. Pairwise comparisons of PC1, PC2, and PC3 are shown in each panel as in Figure 3.

## SUPPLEMENTAL FIGURES

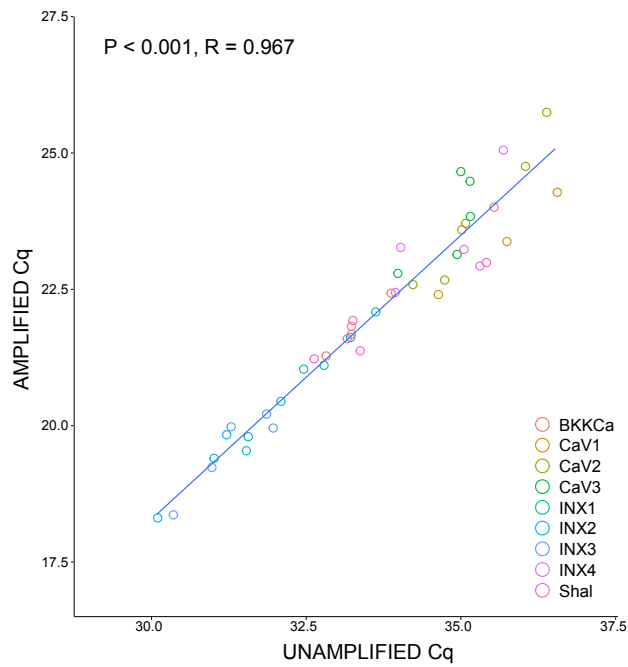

**Figure S1.** Comparison of expression levels of the same single cell samples (N = 5) before (Unamplified) and after (Amplified) 14 cycles of preamplification of cDNA. Each sample represents a cDNA pool from a single identified neuron, half of which was preamplified and half remained unamplified. Data are shown as quantitation cycle (Cq) values. Statistics shown report values for Pearson's Correlation test.

**Table S1.** Top ten contributing genes or contigs to PCs1-3 for each dataset.

| <b>Dataset</b>    | <b>Rank</b> | <b>PC1</b> | <b>PC1 value</b> | <b>PC2</b> | <b>PC2 value</b> | <b>PC3</b> | <b>PC3 value</b> |
|-------------------|-------------|------------|------------------|------------|------------------|------------|------------------|
| <i>qRTPCR</i>     | 1           | LCCH3r     | 3.54             | NaV        | 6.30             | GluCl      | 9.12             |
| <i>qRTPCR</i>     | 2           | mGABA3     | 3.10             | Shal       | 5.65             | GABAB R1   | 8.04             |
| <i>qRTPCR</i>     | 3           | mGluR5     | 3.06             | NMDA_1A    | 5.16             | vAChT      | 7.56             |
| <i>qRTPCR</i>     | 4           | CaV2       | 3.05             | KCNK1      | 4.95             | HisCL      | 6.74             |
| <i>qRTPCR</i>     | 5           | Shab       | 3.02             | Shaker     | 4.54             | ChAT       | 6.57             |
| <i>qRTPCR</i>     | 6           | KCNH3      | 2.97             | IH         | 3.47             | IH         | 6.16             |
| <i>qRTPCR</i>     | 7           | DAR1A      | 2.91             | KCNK2      | 3.45             | INX4       | 6.13             |
| <i>qRTPCR</i>     | 8           | SKKCa      | 2.87             | BKKCa      | 3.10             | vGluT      | 5.29             |
| <i>qRTPCR</i>     | 9           | His 3r     | 2.86             | Dopa 1Br   | 3.06             | RDLr       | 4.16             |
| <i>qRTPCR</i>     | 10          | TRP A like | 2.82             | RDLr       | 2.93             | CCAPr      | 3.11             |
| <i>seq_h2k</i>    | 1           | c1318      | 0.10             | c4636      | 0.50             | c4191      | 0.59             |
| <i>seq_h2k</i>    | 2           | c724       | 0.10             | c8463      | 0.50             | c751       | 0.58             |
| <i>seq_h2k</i>    | 3           | c2022      | 0.10             | c28755     | 0.50             | c8533      | 0.49             |
| <i>seq_h2k</i>    | 4           | c1834      | 0.10             | c17319     | 0.50             | c953       | 0.46             |
| <i>seq_h2k</i>    | 5           | c718       | 0.10             | c10220     | 0.50             | c2665      | 0.46             |
| <i>seq_h2k</i>    | 6           | c2357      | 0.10             | c27163     | 0.49             | c2126      | 0.45             |
| <i>seq_h2k</i>    | 7           | c196       | 0.10             | c5528      | 0.49             | c2981      | 0.45             |
| <i>seq_h2k</i>    | 8           | c739       | 0.10             | c10716     | 0.49             | c3881      | 0.42             |
| <i>seq_h2k</i>    | 9           | c2301      | 0.10             | c9333      | 0.49             | c23433     | 0.41             |
| <i>seq_h2k</i>    | 10          | c1048      | 0.10             | c13463     | 0.49             | c1647      | 0.40             |
| <i>seq_hvg</i>    | 1           | c38450     | 0.50             | c18443     | 0.63             | c29394     | 0.80             |
| <i>seq_hvg</i>    | 2           | c5595      | 0.50             | c17911     | 0.63             | c23916     | 0.80             |
| <i>seq_hvg</i>    | 3           | c28755     | 0.50             | c13615     | 0.63             | c39794     | 0.80             |
| <i>seq_hvg</i>    | 4           | c11256     | 0.49             | c16416     | 0.63             | c24360     | 0.80             |
| <i>seq_hvg</i>    | 5           | c20433     | 0.49             | c17569     | 0.63             | c18403     | 0.79             |
| <i>seq_hvg</i>    | 6           | c39762     | 0.49             | c17622     | 0.63             | c7694      | 0.79             |
| <i>seq_hvg</i>    | 7           | c13489     | 0.49             | c18306     | 0.63             | c11984     | 0.79             |
| <i>seq_hvg</i>    | 8           | c19224     | 0.49             | c19165     | 0.63             | c16991     | 0.79             |
| <i>seq_hvg</i>    | 9           | c30088     | 0.49             | c19999     | 0.63             | c18899     | 0.79             |
| <i>seq_hvg</i>    | 10          | c4923      | 0.49             | c22142     | 0.63             | c25542     | 0.79             |
| <i>seq_DE0.2</i>  | 1           | c5749      | 1.62             | c4517      | 3.20             | c13441     | 5.94             |
| <i>seq_DE0.2</i>  | 2           | c1898      | 1.44             | c398       | 2.92             | c1058      | 4.27             |
| <i>seq_DE0.2</i>  | 3           | c23967     | 1.43             | c878       | 2.92             | c31757     | 3.14             |
| <i>seq_DE0.2</i>  | 4           | c5120      | 1.41             | c4945      | 2.87             | c9248      | 3.05             |
| <i>seq_DE0.2</i>  | 5           | c1219      | 1.39             | c3559      | 2.69             | c2212      | 3.02             |
| <i>seq_DE0.2</i>  | 6           | c8871      | 1.37             | c15559     | 2.64             | c4534      | 2.63             |
| <i>seq_DE0.2</i>  | 7           | c972       | 1.35             | c8507      | 2.50             | c8114      | 2.61             |
| <i>seq_DE0.2</i>  | 8           | c973       | 1.33             | c1151      | 2.15             | c10145     | 2.57             |
| <i>seq_DE0.2</i>  | 9           | c12663     | 1.32             | c8323      | 2.06             | c2981      | 2.47             |
| <i>seq_DE0.2</i>  | 10          | c910       | 1.30             | c1800      | 2.00             | c14660     | 2.35             |
| <i>seq_DE0.05</i> | 1           | c21272     | 4.69             | c4517      | 8.85             | c1058      | 13.16            |
| <i>seq_DE0.05</i> | 2           | c5716      | 4.21             | c16963     | 7.16             | c13441     | 11.60            |
| <i>seq_DE0.05</i> | 3           | c5120      | 4.14             | c3348      | 6.68             | c2212      | 10.64            |
| <i>seq_DE0.05</i> | 4           | c3737      | 3.77             | c1151      | 6.05             | c2586      | 7.17             |
| <i>seq_DE0.05</i> | 5           | c8114      | 3.72             | c14320     | 5.14             | c5845      | 5.83             |
| <i>seq_DE0.05</i> | 6           | c16240     | 3.59             | c5222      | 4.93             | c14320     | 4.87             |
| <i>seq_DE0.05</i> | 7           | c2796      | 3.56             | c8323      | 4.57             | c4997      | 4.10             |
| <i>seq_DE0.05</i> | 8           | c1713      | 3.43             | c5067      | 4.35             | c14660     | 4.06             |
| <i>seq_DE0.05</i> | 9           | c49        | 3.38             | c1324      | 4.12             | c3348      | 4.00             |
| <i>seq_DE0.05</i> | 10          | c3716      | 3.23             | c24846     | 4.08             | c4534      | 3.86             |

**Table S2.** Gene Ontology Enrichment analysis of Molecular Function for H2K RNAseq data.

| <b>GO term: molecular function</b>                                           | <b>Fold Enrichment</b> | <b>FDR p-value</b> |
|------------------------------------------------------------------------------|------------------------|--------------------|
| proton-transporting ATP synthase activity, rotational mechanism (GO:0046933) | 8.08+                  | 2.88E-04           |
| clathrin binding (GO:0030276)                                                | 6.82+                  | 4.51E-03           |
| ubiquitin conjugating enzyme activity (GO:0061631)                           | 4.6+                   | 1.59E-02           |
| intramolecular oxidoreductase activity (GO:0016860)                          | 4.32+                  | 2.22E-02           |
| structural constituent of ribosome (GO:0003735)                              | 4.02+                  | 4.61E-11           |
| proton-transporting ATPase activity, rotational mechanism (GO:0046961)       | 3.84+                  | 4.35E-02           |
| structural constituent of cytoskeleton (GO:0005200)                          | 3.84+                  | 4.30E-02           |
| unfolded protein binding (GO:0051082)                                        | 3.8+                   | 4.00E-05           |
| heat shock protein binding (GO:0031072)                                      | 3.73+                  | 5.01E-02           |
| mRNA 3'-UTR binding (GO:0003730)                                             | 3.73+                  | 4.96E-02           |
| cell adhesion molecule binding (GO:0050839)                                  | 3.57+                  | 3.89E-02           |
| translation factor activity, RNA binding (GO:0008135)                        | 3.27+                  | 4.57E-03           |
| electron transfer activity (GO:0009055)                                      | 3.07+                  | 1.79E-02           |
| GTPase activity (GO:0003924)                                                 | 3.07+                  | 6.09E-05           |
| GTP binding (GO:0005525)                                                     | 2.97+                  | 6.78E-05           |
| actin binding (GO:0003779)                                                   | 2.95+                  | 4.42E-04           |
| kinase binding (GO:0019900)                                                  | 2.85+                  | 7.78E-03           |
| microtubule binding (GO:0008017)                                             | 2.75+                  | 3.98E-03           |
| phospholipid binding (GO:0005543)                                            | 2.56+                  | 3.16E-02           |
| calcium ion binding (GO:0005509)                                             | 2.4+                   | 1.60E-03           |
| protein-containing complex binding (GO:0044877)                              | 2.39+                  | 7.29E-04           |
| ATP binding (GO:0005524)                                                     | 2.31+                  | 1.36E-10           |
| protein serine/threonine kinase activity (GO:0004674)                        | 2.17+                  | 1.31E-02           |
| enzyme regulator activity (GO:0030234)                                       | 1.83+                  | 1.40E-02           |
| DNA-binding transcription factor activity (GO:0003700)                       | 0.41-                  | 1.79E-02           |
| serine-type endopeptidase activity (GO:0004252)                              | 0.1-                   | 1.90E-03           |

**Table S3.** Gene Ontology Enrichment analysis of Biological Process for H2K RNAseq data.

| <b>GO term: biological process</b>                                                               | <b>Fold Enrichment</b> | <b>FDR p-value</b> |
|--------------------------------------------------------------------------------------------------|------------------------|--------------------|
| regulation of short-term neuronal synaptic plasticity (GO:0048172)                               | 10.96+                 | 6.64E-03           |
| positive regulation of neuron remodeling (GO:1904801)                                            | 10.63+                 | 7.39E-05           |
| substrate adhesion-dependent cell spreading (GO:0034446)                                         | 10.23+                 | 2.68E-03           |
| actin filament polymerization (GO:0030041)                                                       | 9.59+                  | 9.52E-03           |
| clathrin-dependent synaptic vesicle endocytosis (GO:0150007)                                     | 8.77+                  | 3.43E-02           |
| protein N-linked glycosylation via asparagine (GO:0018279)                                       | 8.77+                  | 3.42E-02           |
| gluconeogenesis (GO:0006094)                                                                     | 8.53+                  | 1.31E-02           |
| dorsal closure, spreading of leading edge cells (GO:0007395)                                     | 8.53+                  | 1.31E-02           |
| morphogenesis of larval imaginal disc epithelium (GO:0016335)                                    | 7.67+                  | 4.63E-02           |
| retrograde axonal transport (GO:0008090)                                                         | 7.67+                  | 1.79E-02           |
| ATP synthesis coupled proton transport (GO:0015986)                                              | 7.03+                  | 1.14E-04           |
| vesicle transport along microtubule (GO:0047496)                                                 | 6.98+                  | 2.40E-02           |
| axonal transport of mitochondrion (GO:0019896)                                                   | 6.98+                  | 2.39E-02           |
| anterograde axonal transport (GO:0008089)                                                        | 6.98+                  | 2.39E-02           |
| cellular response to metal ion (GO:0071248)                                                      | 6.39+                  | 3.07E-02           |
| axonal fasciculation (GO:0007413)                                                                | 6.14+                  | 3.23E-03           |
| female germ-line stem cell asymmetric division (GO:0048132)                                      | 5.97+                  | 7.80E-03           |
| regulation of reactive oxygen species metabolic process (GO:2000377)                             | 5.9+                   | 3.80E-02           |
| actin nucleation (GO:0045010)                                                                    | 5.48+                  | 4.75E-02           |
| positive regulation of photoreceptor cell differentiation (GO:0046534)                           | 5.48+                  | 4.74E-02           |
| sevenless signaling pathway (GO:0045500)                                                         | 5.42+                  | 2.40E-02           |
| ovarian follicle cell stalk formation (GO:0030713)                                               | 5.42+                  | 2.39E-02           |
| synaptic vesicle priming (GO:0016082)                                                            | 5.42+                  | 2.39E-02           |
| flight behavior (GO:0007629)                                                                     | 5.42+                  | 2.39E-02           |
| positive regulation of endocytosis (GO:0045807)                                                  | 5.42+                  | 3.15E-04           |
| positive regulation of lipid localization (GO:1905954)                                           | 5.42+                  | 2.38E-02           |
| positive regulation of canonical Wnt signaling pathway (GO:0090263)                              | 5.39+                  | 1.58E-04           |
| ribosomal large subunit assembly (GO:0000027)                                                    | 5.37+                  | 1.19E-02           |
| positive regulation of smoothed signaling pathway (GO:0045880)                                   | 5.31+                  | 3.15E-03           |
| positive regulation of protein modification by small protein conjugation or removal (GO:1903322) | 5.12+                  | 2.94E-02           |
| glucose homeostasis (GO:0042593)                                                                 | 5.12+                  | 2.40E-04           |
| lumen formation, open tracheal system (GO:0035149)                                               | 5.12+                  | 3.83E-03           |
| cellular protein complex disassembly (GO:0043624)                                                | 5.12+                  | 7.47E-03           |
| glycolytic process (GO:0006096)                                                                  | 4.91+                  | 8.93E-03           |
| oocyte microtubule cytoskeleton polarization (GO:0008103)                                        | 4.85+                  | 3.49E-02           |
| hemocyte migration (GO:0035099)                                                                  | 4.6+                   | 4.17E-02           |
| negative regulation of supramolecular fiber organization (GO:1902904)                            | 4.55+                  | 1.26E-02           |
| maintenance of protein location in cell (GO:0032507)                                             | 4.51+                  | 4.05E-03           |
| regulation of R7 cell differentiation (GO:0045676)                                               | 4.39+                  | 4.95E-02           |
| cell adhesion mediated by integrin (GO:0033627)                                                  | 4.39+                  | 4.94E-02           |
| positive regulation of neuromuscular junction development (GO:1904398)                           | 4.39+                  | 4.76E-03           |
| terminal branching, open tracheal system (GO:0007430)                                            | 4.39+                  | 1.49E-02           |
| pole plasm oskar mRNA localization (GO:0045451)                                                  | 4.32+                  | 9.07E-03           |
| positive regulation of organ growth (GO:0046622)                                                 | 4.3+                   | 3.01E-02           |
| antibiotic metabolic process (GO:0016999)                                                        | 4.3+                   | 3.00E-02           |
| adherens junction organization (GO:0034332)                                                      | 4.26+                  | 5.62E-03           |
| epithelial cell migration, open tracheal system (GO:0007427)                                     | 4.26+                  | 5.61E-03           |
| regulation of cell-cell adhesion (GO:0022407)                                                    | 4.23+                  | 1.77E-02           |
| intestinal stem cell homeostasis (GO:0036335)                                                    | 4.23+                  | 1.77E-02           |
| regulation of filopodium assembly (GO:0051489)                                                   | 4.19+                  | 1.06E-02           |
| heart morphogenesis (GO:0003007)                                                                 | 4.15+                  | 6.50E-03           |
| negative regulation of autophagy (GO:0010507)                                                    | 4.13+                  | 3.47E-02           |
| reactive oxygen species metabolic process (GO:0072593)                                           | 4.13+                  | 3.45E-02           |
| plasma membrane invagination (GO:0099024)                                                        | 4.13+                  | 3.45E-02           |
| ATP hydrolysis coupled proton transport (GO:0015991)                                             | 4.04+                  | 7.57E-03           |
| olfactory learning (GO:0008355)                                                                  | 4.04+                  | 7.54E-03           |
| positive regulation of translation (GO:0045727)                                                  | 4.04+                  | 7.50E-03           |
| rhabdomere development (GO:0042052)                                                              | 4.02+                  | 4.61E-03           |
| synaptic growth at neuromuscular junction (GO:0051124)                                           | 3.95+                  | 1.43E-02           |
| protein folding (GO:0006457)                                                                     | 3.93+                  | 6.74E-08           |
| establishment of mitotic spindle localization (GO:0040001)                                       | 3.84+                  | 4.66E-02           |
| salivary gland cell autophagic cell death (GO:0035071)                                           | 3.84+                  | 4.65E-02           |
| insulin receptor signaling pathway (GO:0008286)                                                  | 3.84+                  | 4.64E-02           |

|                                                                                    |       |          |
|------------------------------------------------------------------------------------|-------|----------|
| regulation of lipid storage (GO:0010883)                                           | 3.74+ | 1.15E-02 |
| negative regulation of cytoskeleton organization (GO:0051494)                      | 3.72+ | 3.20E-02 |
| negative regulation of smoothened signaling pathway (GO:0045879)                   | 3.72+ | 3.20E-02 |
| mitochondrial ATP synthesis coupled electron transport (GO:0042775)                | 3.65+ | 1.75E-04 |
| regulation of peptide secretion (GO:0002791)                                       | 3.64+ | 2.21E-02 |
| behavioral response to ethanol (GO:0048149)                                        | 3.63+ | 3.40E-03 |
| regulation of chemotaxis (GO:0050920)                                              | 3.61+ | 3.63E-02 |
| response to unfolded protein (GO:0006986)                                          | 3.61+ | 3.62E-02 |
| positive regulation of cell size (GO:0045793)                                      | 3.57+ | 1.48E-02 |
| tight junction organization (GO:0120193)                                           | 3.54+ | 2.50E-02 |
| apical junction assembly (GO:0043297)                                              | 3.52+ | 1.02E-02 |
| cytosolic transport (GO:0016482)                                                   | 3.5+  | 4.39E-03 |
| cytokinetic process (GO:0032506)                                                   | 3.49+ | 1.69E-02 |
| regulation of axonogenesis (GO:0050770)                                            | 3.47+ | 3.00E-03 |
| negative regulation of protein phosphorylation (GO:0001933)                        | 3.44+ | 2.05E-03 |
| positive regulation of cell morphogenesis involved in differentiation (GO:0010770) | 3.41+ | 4.69E-02 |
| establishment or maintenance of apical/basal cell polarity (GO:0035088)            | 3.37+ | 3.20E-02 |
| regulation of multicellular organism growth (GO:0040014)                           | 3.34+ | 2.20E-02 |
| morphogenesis of follicular epithelium (GO:0016333)                                | 3.31+ | 1.47E-02 |
| translational initiation (GO:0006413)                                              | 3.25+ | 1.65E-02 |
| regulation of protein stability (GO:0031647)                                       | 3.25+ | 1.65E-02 |
| neuromuscular synaptic transmission (GO:0007274)                                   | 3.23+ | 1.13E-02 |
| autophagy (GO:0006914)                                                             | 3.23+ | 4.15E-04 |
| imaginal disc-derived wing margin morphogenesis (GO:0008587)                       | 3.19+ | 1.86E-02 |
| mitotic cytokinesis (GO:0000281)                                                   | 3.16+ | 6.07E-03 |
| long-term memory (GO:0007616)                                                      | 3.15+ | 4.15E-03 |
| germ-line stem cell population maintenance (GO:0030718)                            | 3.15+ | 2.84E-03 |
| asymmetric neuroblast division (GO:0055059)                                        | 3.14+ | 4.50E-02 |
| cell redox homeostasis (GO:0045454)                                                | 3.13+ | 3.09E-02 |
| response to growth factor (GO:0070848)                                             | 3.13+ | 3.08E-02 |
| synaptic target recognition (GO:0008039)                                           | 3.13+ | 3.07E-02 |
| amino acid transport (GO:0006865)                                                  | 3.01+ | 3.76E-02 |
| axon guidance (GO:0007411)                                                         | 2.94+ | 1.77E-08 |
| positive regulation of locomotion (GO:0040017)                                     | 2.63+ | 4.08E-02 |
| negative regulation of neurogenesis (GO:0050768)                                   | 2.63+ | 3.09E-02 |



**Table S4.** Gene Ontology Enrichment analysis of Molecular Function for HVG RNAseq data.

| <b>GO term: molecular function</b> | <b>Fold Enrichment</b> | <b>FDR p-value</b> |
|------------------------------------|------------------------|--------------------|
| ATP binding (GO:0005524)           | 3.1+                   | 1.72E-03           |
| transferase activity (GO:0016740)  | 2+                     | 2.38E-02           |

**Table S5.** Gene Ontology Enrichment analysis of Biological Process for HVG RNAseq data.

| <b>GO term: molecular function</b>                                 | <b>Fold Enrichment</b> | <b>FDR p-value</b> |
|--------------------------------------------------------------------|------------------------|--------------------|
| regulation of protein localization to plasma membrane (GO:1903076) | 35.33+                 | 4.79E-02           |
| chromatin silencing (GO:0006342)                                   | 7.69+                  | 3.12E-02           |
| nucleic acid metabolic process (GO:0090304)                        | 2.17+                  | 3.74E-02           |
| macromolecule modification (GO:0043412)                            | 2.08+                  | 3.91E-02           |
| cellular macromolecule metabolic process (GO:0044260)              | 1.84+                  | 2.22E-02           |

**Table S6.** Gene Ontology Enrichment analysis of Molecular Function for DE0.2 RNAseq data.

| <b>GO term: molecular function</b>                                         | <b>Fold Enrichment</b> | <b>raw p-value</b> |
|----------------------------------------------------------------------------|------------------------|--------------------|
| choline:sodium symporter activity (GO:0005307)                             | > 100+                 | 7.51E-03           |
| acetylcholine transmembrane transporter activity (GO:0005277)              | > 100+                 | 7.51E-03           |
| dihydroorotase activity (GO:0004151)                                       | > 100+                 | 7.51E-03           |
| choline O-acetyltransferase activity (GO:0004102)                          | > 100+                 | 7.51E-03           |
| carboxyl- or carbamoyltransferase activity (GO:0016743)                    | > 100+                 | 7.51E-03           |
| carbamoyl-phosphate synthase (glutamine-hydrolyzing) activity (GO:0004088) | > 100+                 | 7.51E-03           |
| aspartate carbamoyltransferase activity (GO:0004070)                       | > 100+                 | 7.51E-03           |
| very-long-chain-acyl-CoA dehydrogenase activity (GO:0017099)               | > 100+                 | 7.51E-03           |
| latrotoxin receptor activity (GO:0016524)                                  | > 100+                 | 7.51E-03           |
| glutamine binding (GO:0070406)                                             | > 100+                 | 7.51E-03           |
| L-iduronidase activity (GO:0003940)                                        | > 100+                 | 7.51E-03           |
| choline binding (GO:0033265)                                               | > 100+                 | 7.51E-03           |
| myosin II light chain binding (GO:0032033)                                 | > 100+                 | 1.12E-02           |
| kinetochore binding (GO:0043515)                                           | > 100+                 | 1.12E-02           |
| GABA-gated chloride ion channel activity (GO:0022851)                      | 88.25+                 | 1.50E-02           |
| receptor antagonist activity (GO:0048019)                                  | 88.25+                 | 1.50E-02           |
| GABA-A receptor activity (GO:0004890)                                      | 66.19+                 | 1.87E-02           |
| smoothened binding (GO:0005119)                                            | 66.19+                 | 1.87E-02           |
| patched binding (GO:0005113)                                               | 66.19+                 | 1.87E-02           |
| histone demethylase activity (H3-K4 specific) (GO:0032453)                 | 66.19+                 | 1.87E-02           |
| kinesin binding (GO:0019894)                                               | 58.83+                 | 7.47E-04           |
| histone demethylase activity (H3-K36 specific) (GO:0051864)                | 52.95+                 | 2.24E-02           |
| morphogen activity (GO:0016015)                                            | 52.95+                 | 2.24E-02           |
| MAP-kinase scaffold activity (GO:0005078)                                  | 52.95+                 | 2.24E-02           |
| extracellular matrix binding (GO:0050840)                                  | 52.95+                 | 2.24E-02           |
| axon guidance receptor activity (GO:0008046)                               | 44.12+                 | 2.61E-02           |
| protein kinase C binding (GO:0005080)                                      | 44.12+                 | 2.61E-02           |
| RNA polymerase II activity (GO:0001055)                                    | 29.42+                 | 3.70E-02           |
| epidermal growth factor receptor binding (GO:0005154)                      | 29.42+                 | 3.70E-02           |
| phosphatidylserine binding (GO:0001786)                                    | 29.42+                 | 3.70E-02           |
| cell-cell adhesion mediator activity (GO:0098632)                          | 24.07+                 | 4.42E-02           |
| fatty-acyl-CoA binding (GO:0000062)                                        | 24.07+                 | 4.42E-02           |
| microtubule plus-end binding (GO:0051010)                                  | 22.06+                 | 4.78E-02           |
| calcium-dependent phospholipid binding (GO:0005544)                        | 22.06+                 | 4.78E-02           |
| amino acid transmembrane transporter activity (GO:0015171)                 | 9.46+                  | 2.01E-02           |
| flavin adenine dinucleotide binding (GO:0050660)                           | 7.79+                  | 2.85E-02           |
| GTP binding (GO:0005525)                                                   | 5.12+                  | 2.15E-02           |



**Table S7.** Target primer and probe sequences for qRT-PCR Multiplex assays. Each box represents a group of four to five genes that were combined into a single multiplex reaction.

| <i>Gene</i>        | <i>Accession #</i> | <i>Forward / Reverse Primer 5'-3' sequence</i>   | <i>Probe 5'-3' sequence</i>   |
|--------------------|--------------------|--------------------------------------------------|-------------------------------|
| <i>HTR1A</i>       | KU710381.1         | AACCGCTGTGGTAGTTTCCA / TGCTCGTTAACCCGGACTAAG     | AGCGCCTTTATTGGCTGGAAGGA       |
| <i>HTR2</i>        | KU710380.1         | TCCGCCTCCATCAAGTTTGT / GCACGTGGCGGATGAAGAAC      | TCATCGAAGAGACCGGGAGGACC       |
| <i>HTR7</i>        | KU710379.1         | ACGGCGATGGCTCCATCTGT / CGGTGAGCGGGATGTAGAAG      | TGAGGTGTGCAACAACCTCTGGTACC    |
| <i>DAR2</i>        | KU710378.1         | GAAGCCGAAAGTGAGTGATACA / TCCGACTAAGCCGTGTTTC     | TGTGATCGAGAATGTACACAGACGA     |
| <i>DAR1A</i>       | KU710377.1         | GGCCCTGTCTCCATCTCACT / CGCGGTAGATCGGGAAGTAAAG    | ACCTTGTGTCTCTCTACTACTAGCCTTCT |
| <i>GABAB-R1</i>    | KU986868.1         | TCGTCTCGTTTGCATCATC / GGTGCCGAACCTCAATGATC       | TCTGTCTCTCTCTCCATGGCT         |
| <i>LCCH3r</i>      | KU986871.1         | TGACGGCTCCATCACTAATGT / TTGGGTGTCGAGTGGATAGTAG   | TTCAACACTAGCTTGGCTGCAT        |
| <i>RDLr</i>        | KU986872.1         | TGGTGTTCGCTCGCTTCTAG / TCCGCTGTCTGCTAACTTC       | AATACGCCCGGTGGGTACAT          |
| <i>GluCl</i>       | KX059698.1         | ACGGAGGATCTGGTGTCTCTG / ACCCGTGTGGTCTTGTCTGT     | TACAGGTGACAAAGAACCTTCACC      |
| <i>NALCN</i>       | KU681457.1         | TCCGTTCCACGGTGTACATTC / GCGGTGCCTTTGTTCTCAG      | TCTTCGTCTCTGGCTGCATGA         |
| <i>CACNAB</i>      | GEFB01006512       | GCAGCTGGCCAAAGACTTCTTT / AGACGCTGCAATACCTTAGGA   | AGGCCCATCTCTCGTGTACTTAAG      |
| <i>IRK</i>         | KU681451.1         | TACAGTGGCGTTGGACTCTAC / TCCACCACACCAAGGCAAATAG   | TCGTGTTCGCTATGTCACTTATCAGC    |
| <i>IH</i>          | DQ103257.3         | TCGGTGCCACTAGACTACATC / GACCCGGCTGGAGAATCTG      | TCCTCATCTTCAACAGGACTTCAGC     |
| <i>SKKCa</i>       | KU710383.1         | GCATCGGAGCATTGAACAGAA / GCCCGACAGATAGTCATCAG     | CAACTTCAACACTCGGTTTGTCTCAA    |
| <i>INX1</i>        | JQ994479.1         | TGGAGCGTCACTGATGCTAG / GAGCAGGATGCAAGGATCAG      | TGCTGCCTCTCAACACTTAAACGAA     |
| <i>INX2</i>        | JQ994480.1         | GGCTGTGGTGTCTGGTGTAG / GCGGAGAGCGTGTCTTAAACAG    | CTGCTGTACCGCCTGCCACTTT        |
| <i>INX3</i>        | JQ994481.1         | TGTCGGCCCTAGTGAAGAG / GGTACCGTGGGATGTAGAACA      | TGACGAGATTGTGTACCAGCTTAC      |
| <i>INX4</i>        | KJ642222.1         | CTGGCGTTCAGCTCATTGTC / CAGTCTCTGGATCTCCTTAG      | CACGCGTCAGTATGTCGGGAACC       |
| <i>INX5</i>        | KJ817410.1         | TGCCTTCCCTGCTGGATAA / GCGTCAACCATTGGTAGTAA       | AGGTGGCTATCCAGGCATCGGT        |
| <i>Shaw1</i>       | KU681456.1         | CGCGTCACTCTCAGGACTT / CCCAGCACCAGGAAGAACAC       | TGATACAGACTTTCCTGTCATCCG      |
| <i>Shaw2</i>       | KU681455.1         | GAACGCCATCAAGCACTATCATC / ATGGCGCCGACAGCTTAG     | TGGCTTGAAGGACGGTCTCAACA       |
| <i>Nav</i>         | EF089568.2         | TCAACGGGAGGTACCATAAGTG / TCGCTGTCAACCAAGAGTAG    | CGGAGGGATTGAAGCTAACCGCA       |
| <i>Shaker</i>      | FJ263946.1         | GAGGCTCAGAAGACCAGTCAAC / TGCGGATATCCACCGAGCTCAT  | CACCTGATGTCTTCGCGGAGGAGAT     |
| <i>Shab</i>        | DQ103255.1         | GAGCCGGACAGACAGGAAC / TGGCCCTCTTCTGTAGTC         | AAGAACCACGAACACCATGGGTC       |
| <i>CaV1</i>        | JN809809.1         | CCAGCCCTTCTACTGGCTCATT / GCTGGGATAGTGCTCACTG     | TGTGTCTGTCTCTCAACACGG         |
| <i>CaV2</i>        | JN809808.1         | ATCCGCGGACAGTAAGG / GTTCGGCAGCAACAACAAC          | TGTTTCTACTGGTCTGCATCATCTGTT   |
| <i>CaV3</i>        | JN809810.1         | TGGCTGCCACCGATACTTC / CAGCACAATGCCACAACCTG       | CAGGACAGAGATGGAACAGTTGGA      |
| <i>Shal</i>        | DQ103254.1         | GACACCCTTCACTCCATTTC / GAACCATGTGCGCGTATCCTA     | CGGCGTTTGGTACACCTTGTAC        |
| <i>BKKCa</i>       | DQ103256.4         | GCTCAAACTCGGTTCAATG / CTGCGTGTCTGGAGAAGTTT       | AGAATCCCGCGCTAAACATGACT       |
| <i>mGluR1</i>      | KU986879.1         | GCATCGTGTGGCTCATCTTTG / GGCCAACGTGACCACCTAAT     | ACCTGTCAGCGGGAGTCACTGATG      |
| <i>mGluR2</i>      | KU986880.1         | TCCCGAGGTGAGTTTCTTC / CCATGGCTTTCATTTGGTAATGG    | CCACGTGCGCTGAACTGAGTAACA      |
| <i>mGluR4</i>      | KU986882.1         | GCGCGTTGATTCCGGTACT / CCATCATCGTCTCAACTTC        | AAGTCTTCCCGTGGACTACGAA        |
| <i>mGluR5</i>      | KU986883.1         | GCCTGTCTTGGCATGATC / TGCGCGTGTGATCTTCTTG         | CGCTTGTACCAAGACCAACCCG        |
| <i>mGluR7</i>      | KU986884.1         | ACCGCGTCCGAGATTGTC / TGGCTGGCGTTCACATC           | TCTGGACTGGTGTGCTGACT          |
| <i>mACHrA</i>      | KX021822.1         | GGTGTGCGATGCCTTTGTTTAC / GCCAGCCAGGTGTCACATAT    | TGTACACGCTGATGGGATACTGGC      |
| <i>mACHrB</i>      | KX021821.1         | GCGGACCATCTCCATCTATTC / TGGTGCATGACAGAAAGCT      | CCTTGTGGCCCTGTGGACGCC         |
| <i>mGABA2</i>      | KU986869.1         | TGCTTACAAAGGCTGCTAATGG / TGCTTCAAGCCGGTATGTT     | TGTTTGTCTCTGGCTGGGAAA         |
| <i>mGABA3</i>      | KU986870.1         | CGATCCCATGACGAGACACAT / TCCACCTGTGGCTGATAGAC     | CCTCACCTTAGAAGTGTACGCCA       |
| <i>mGluR3</i>      | KU986881.1         | CACCGTGTATGGCGTCAAGAC / CCCGGTCCGAAGTAGATG       | CCCCGAGAATTTCAACGAGAGCAAGT    |
| <i>TRP-M3</i>      | KX037433.1         | CCGACCATCTACGAGAAC / TGCTGGCCTGGAAAGATGT         | TGCTCAAGTCTCTCGTCTCAAC        |
| <i>TRP-A-like</i>  | KX037434.1         | TGCGGACCTTCCCAAATTC / CGGTACTGTAGTCTCAACAC       | CACGGTCTTCTACTCTCTCATCCG      |
| <i>TRP-AI</i>      | KX037435.1         | CTGCCAAGTACGGTCTGTAAAC / CCCTCGTACTGCACCTGTTA    | ACGTCAGCTGTGGAGTCTCTGAA       |
| <i>TRP-M1</i>      | KX037436.1         | GAGGGCGGACCTCAAATCATC / TGTCGGCTGTCTTCTGTT       | CGTCAGGTGTGGAGTATGTCACCTG     |
| <i>TRP-M-like</i>  | KX037437.1         | GACGGGACGACAGATCTCTTC / GAGTGTCTGGGCTGTAGGT      | ACGGTATACGGTGTGCTATTTCCA      |
| <i>Dopa-1Br</i>    | KU710376.1         | CGAAAGATTGGCAACCTTCTC / CAGAGGGCAAAGCTCATCAC     | TGCTCTGGTATCGCTGACCTTCT       |
| <i>5HTR-1Br</i>    | KU710382.1         | TGACGCGAGTGGACTACATTC / GGAACGACACCACCAGATC      | ACCGATCGCCGCTGCGATC           |
| <i>His-1r</i>      | KU716100.1         | TGCTTCCGAGAGTAACTTATG / GACAGGTGGGAGGATTTCTG     | CATCACTTCTCACTGTCAACCCAA      |
| <i>His-2r</i>      | KU716101.1         | CCGCCACAGTCTCAAGTAAATC / GCGTAGGTCGAGAACTCTCATC  | ACGGTAGTCTACTTCCAGCTACA       |
| <i>His-3r</i>      | KU716102.1         | ATCCGCGCAACAAAGCAT / GAGAGCGAAGGAGGTTGGAA        | TGATGGTGGATCGAGTCTCAAGATATGAT |
| <i>kainate-1A</i>  | KX016772.1         | CAGGTCCGAGTGCAGTAAAGAC / GCCACCAGTCAAGATGTAGAAG  | CGATGACCACCCAGCAGGAGTGC       |
| <i>kainate-1B</i>  | KX016773.1         | TGAGCAGAACGAGATCGAGTATG / CGCCACATGTTCTGATACGTC  | AGGGCGGGTCCACATGGCCTT         |
| <i>kainate-2A</i>  | KX016774.1         | CGCATGGAGTCACTATTGAGA / AGGCCAAAGTGGTGCCAGTTG    | TGAGGACCTGTAAACCAGGACAA       |
| <i>kainate-2B</i>  | KX016775.1         | GCACGGCAAGTTTGACAAGAA / GTCTCCCTCTGTAAGTATG      | AACGGCATGATTGGGCACTGTT        |
| <i>kainate-2C</i>  | KX016776.1         | GGCTTGGTCAAGGAACTCAAG / GCTCTCCCTCGCTAGTTG       | TGATCTAGCGGTGGTCTATGACTA      |
| <i>NMDA-1A</i>     | KX016782.1         | GCCGTCAAATCAGGGAGGTT / ACCGGCGGTTACCAGTTCAC      | AGGCGTTCATCTGGGACAGTTCACGT    |
| <i>NMDA-1B</i>     | KX016783.1         | ACAGCCAAGACGAAGAAGAC / CCGCTGTTCAAGATGACAGA      | TGAGTTCATGGCCATCTCGGAGTC      |
| <i>NMDA-2A</i>     | KX016785.1         | TCGGGTTCTGTTCCCTTAC / TGATGCCGTCCGTGATAGAAG      | TGAGACCATCTTCCAAAGCACC        |
| <i>NMDA-2B</i>     | KX016786.1         | GCAAGGGTCAACATCAGACA / CGCTGTGAGCATGATGTAGGTA    | TGGAGAAACAACCTGAGGCCAATGGA    |
| <i>NMDA-2-like</i> | KX016784.1         | GCGTTGGAGCAGTTCATGTC / GCCACATACTGACGGAAAGTAC    | CACGTTCTGTGTTGGGTTGTTG        |
| <i>KCNK2</i>       | KU681437.1         | GACGCCTTCTACTACTGCTTATC / GAGGGCGTCTCTCTCTGTAG   | CCCTCACTACATTGGCTTCGGG        |
| <i>KCNK1</i>       | KU681438.1         | TGGCGAAGCACTCAACAAAG / GTCCTGGCAATTAAGGATCTTC    | CTCTCCATCCGATCAGGCCAA         |
| <i>KCNQ1</i>       | KU681453.1         | GAGCCTCTTGGGAAACCTATG / CCGCTCAGGAAAGTTGTAGAC    | CTCTCGAGGGACGTCCGCTAC         |
| <i>KCNQ2</i>       | KU681452.1         | GCTGCCATGTGTAGTCAAGTG / CCACGTTGTGTAGAGTTGAAG    | TGTGGCGTGTGTATGCTCAGATAA      |
| <i>KCNH2</i>       | KU681459.1         | CACCGGAGATCCTTCTAC / CCTGATGTGGAGGCTGAGTAG       | CATCTTCGAGACAGCTCGCAGG        |
| <i>KCNH3</i>       | KU681460.1         | GAGGCGACGTACTTACCTCTATG / AGTGGCGTACATGCAAGGATTC | ACTTCACTCAAGAGGCTCGCTAGA      |
| <i>KCNH1</i>       | KU681458.1         | GGTCACGTCACCACCATCATC / CCGCACGTTGTGAGCATTC      | ATGACCTCCGCGACCACCAAGT        |
| <i>KCNT1</i>       | KU681454.1         | CGTCCAGACCATGTTCAAGTTG / AAGCGCATGTTGGACGACTG    | TCCCAACATCAAAATCATCACGGA      |
| <i>CCAPr</i>       | KM349850.1         | GCCCTTCTCTCTCAAAATCAC / GTCGGTGAGAACGCTGATGAG    | CCAGGACCAACTTCTCATCATGCATCT   |
| <i>vGluT</i>       | MK958905           | GCGTTCGTGGACCTTCTAC / TCAGCAACCTGTAAATGGAA       | ATCACAGCCAACCTACTTCAGCGAG     |
| <i>ChAT</i>        | MK958903           | GGACCGCTGGCTAAGTAC / TCGCGAAGTCCATAAGG           | AGGGCGCGCTCAAGCTTCAGAC        |
| <i>vAChT</i>       | MK958904           | GCGTCAGCTGCTTCTCTCT / CAGCAGTGCCTGTCTATGAG       | TTGCCAGCAACTACTGGGTGTT        |
| <i>ACHE</i>        | MK958902           | GGGCAACATGGGCATGTAC / GGTCAACCACGAAGAATTCATG     | AGGCGCTGGCCATCAAGTGGATAC      |
